# Supplementary material for: Effects of Fecal Microbiome Transfer in Adolescents With Obesity: The Gut Bugs Randomized Controlled Trial
Source: PubMed Central journal article supplement (PMC7753902; doi:10.1001/jamanetworkopen.2020.30415), 2020-12-21
Supplement: jamanetwopen-e2030415-s001.pdf [file jamanetwopen-e2030415-s001.pdf]

1           **Protocol for the Gut Bugs Trial: a randomised double-blind**  
2           **placebo-controlled trial of gut microbiome transfer for the**  
3           **treatment of obesity in adolescents**

4  
5           Karen S W Leong<sup>1,2</sup>, Thilini N Jayasinghe<sup>1</sup>, José G B Derraik<sup>1,2,3</sup>, Benjamin B Albert<sup>1,2</sup>,  
6           Valentina Chiavaroli<sup>1</sup>, Darren M Svirskis<sup>4</sup>, Kathryn L Beck<sup>5</sup>, Cathryn A Conlon<sup>5</sup>, Yannan  
7           Jiang<sup>6</sup>, William Schierding<sup>1</sup>, Tommi Vatanen<sup>1,7</sup>, David J Holland<sup>8</sup>, Justin M O’Sullivan<sup>1,2†</sup>,  
8           Wayne S Cutfield<sup>1,2†</sup>

9  
10          <sup>1</sup> Liggins Institute, University of Auckland, Auckland, New Zealand.

11          <sup>2</sup> A Better Start – National Science Challenge, University of Auckland, Auckland, New Zealand.

12          <sup>3</sup> Department of Women's and Children's Health, Uppsala University, Uppsala, Sweden.

13          <sup>4</sup> School of Pharmacy, Faculty of Medical and Health Sciences, University of Auckland, Auckland,  
14          New Zealand.

15          <sup>5</sup> School of Sport Exercise and Nutrition, College of Health, Massey University, Auckland, New  
16          Zealand.

17          <sup>6</sup> Department of Statistics, University of Auckland, Auckland, New Zealand.

18          <sup>7</sup> Broad Institute of MIT and Harvard, Cambridge, Massachusetts, USA.

19          <sup>8</sup> Department of Infectious Diseases, Counties Manukau District Health Board, Auckland, New Zealand.

20  
21          †JM O’Sullivan and WS Cutfield contributed equally to the study.

22  
23          Corresponding author: Professor Wayne Cutfield, Liggins Institute, University of Auckland, Private  
24          Bag 92019, Auckland, New Zealand; e-mail w.cutfield@auckland.ac.nz; ph +64.9.923.4476; fax  
25          +64.9.373.8763.

26  
27          **Competing interests:** The authors have no financial conflicts of interest to disclose that may be  
28          relevant to this work. The funders had no role in study design, decision to publish, or preparation of this  
29          manuscript.

30  
31          **Word count:** 5,405

32  
33          **This study protocol has been published in BMJ Open and is available at**  
34          <https://bmjopen.bmj.com/content/9/4/e026174.long>

36 **ABSTRACT**

37

38 **Introduction:** Animal studies showed that germ-free mice inoculated with normal mouse gut bacteria  
39 developed obesity, insulin resistance, and higher triglyceride levels, despite similar food intake. In  
40 humans, an association has been found between obesity and gut microbiome dysbiosis. However, gut  
41 microbiome transfer has not been evaluated for the treatment of human obesity. We will examine the  
42 effectiveness of gut microbiome transfer using encapsulated material for the treatment of obesity in  
43 adolescents.

44

45 **Methods and analysis:** A two-arm, double-blind, placebo-controlled, randomised clinical trial of a  
46 single course of gut microbiome transfer will be conducted in 80 obese (BMI  $\geq 30$  kg/m<sup>2</sup>) adolescents  
47 (males and females, aged 14–18 years) in Auckland, New Zealand. Healthy lean donors (males and  
48 females, aged 18–28 years) will provide fresh stool samples from which bacteria will be isolated and  
49 double encapsulated. Participants (recipients) will be randomised at 1:1 to control (placebo) or  
50 treatment (gut microbiome transfer), stratified by sex. Recipients will receive 28 capsules over two  
51 consecutive mornings (~14 ml of frozen microbial suspension or saline). Clinical assessments will be  
52 performed at baseline, 6, 12, and 26 weeks, and will include: anthropometry, blood pressure, fasting  
53 metabolic markers, dietary intake, physical activity levels, and health-related quality of life. Insulin  
54 sensitivity (Matsuda index), gut microbiota population structure characterized by 16S rRNA amplicon  
55 sequencing, and body composition (DXA) will be assessed at baseline, 6, 12, and 26 weeks. 24-hour  
56 ambulatory blood pressure monitoring will be performed at baseline and at 6 weeks. The primary  
57 outcome is BMI standard deviation scores (SDS) at 6 weeks, with BMI SDS at 12 and 26 weeks as  
58 secondary outcomes. Other secondary outcomes include insulin sensitivity, adiposity (total body fat  
59 percentage), and gut microbial composition at 6, 12, and 26 weeks. Statistical analysis will be  
60 performed on the principle of intention to treat.

61

62 **Ethics and dissemination:** Ethics approval was provided by the Northern A Health and Disability  
63 Ethics Committee (HDEC) (Ministry of Health, New Zealand; 16/NTA/172). The trial results will be  
64 published in peer-reviewed journals and presented at international conferences.

65

66 **Trial registration number:** ACTRN12615001351505

67

68

69 **Strengths of this study**

- 70
- 71 ▪ This is the largest registered randomised clinical trial of gut microbiome transfer for obesity or
  - 72 insulin resistance in children or adults.
  - 73 ▪ The double-blind, placebo-controlled design, use of capsules as a non-invasive method of delivery,
  - 74 and characterisation of bacterial diversity and viability in donor stools are main strengths of this
  - 75 randomised clinical trial.
  - 76 ▪ Conducting a 6-month follow-up after a single treatment with gut microbiome will allow
  - 77 identification of a possible lag between treatment and change in BMI.
  - 78 ▪ This study is adequately powered to show a meaningful reduction in BMI SDS in the treated group.

79

80 **Limitations of this study**

81

82 Our study will focus on obese adolescents, so that the findings may not be readily extrapolated to

83 individuals with lesser degrees of adiposity or to older adults.

84

85 **INTRODUCTION**

86

87 There is an increasing prevalence of obesity amongst children and adolescents<sup>1</sup>. Obesity tracks and

88 amplifies through life<sup>2 3</sup>, and childhood obesity is associated with even greater severity of obesity and

89 related co-morbidities in adulthood<sup>2 4</sup>. An elevated body mass index (BMI) in adolescence is associated

90 with an increased all-cause mortality in adult life, and it is more predictive of later mortality than an

91 elevated adult BMI<sup>5 6</sup>.

92

93 New paradigms on the causes of obesity incorporate a pivotal role for the gut microbiota (*i.e.* the

94 microbial community present in the gastrointestinal tract). In recent years, assessments of the gut

95 microbiome (all of the genes inside these gut microbiota cells) have identified reduced diversity of

96 bacterial taxa as having an important effect on the development of obesity, insulin resistance, and

97 diabetes mellitus<sup>7 8</sup>. The concept that the gut microbiome influences host metabolism and adiposity was

98 introduced through gut microbiome transfer experiments in gnotobiotic (*i.e.* germ-free) mice<sup>9 10</sup>. These

99 gnotobiotic mice have sterile colons and 40% less body fat than conventional mice, despite a food

100 intake that is 29% higher<sup>9</sup>. When germ-free mice were inoculated with normal mouse gut bacteria, they

101 developed obesity, insulin resistance, and increased triglycerides levels, while on the same food

102 intake<sup>11</sup>. Further experiments showed that the gut microbiome modulates both sides of the energy

103 balance equation by: (i) increasing energy yield from the diet stored as triglycerides; and (ii) altering

104 energy expenditure via fatty acid oxidation<sup>10 12 13</sup>. These effects occur either directly within the bowel,

105 or indirectly through the effects of bacterial products that enter the circulation. Current literature

106 indicates that changes to the gut microbiome and their respective products within the host circulation  
107 (e.g. lipopolysaccharides and short-chain fatty acids) can alter host responses, modulate insulin  
108 resistance, adiposity, and atherosclerosis and have an effect on the development of non-alcoholic fatty  
109 liver disease<sup>14 15</sup>.

110  
111 Gut microbiome transfer is now regularly used to treat recurrent or refractory *Clostridium difficile*  
112 colitis, which is associated with considerable morbidity and a reported 38% mortality<sup>16</sup>. Other treatment  
113 regimens for this disorder have relied on repeated courses of vancomycin, typically with low cure rates  
114 (~31%)<sup>17</sup>. By contrast, a single naso-duodenal infusion of a 'healthy' gut microbiome in elderly patients  
115 with chronic *C. difficile* colitis led to cure in 81% of subjects<sup>17</sup>. This<sup>17</sup> and other studies<sup>18-20</sup> have  
116 demonstrated that gut microbiome transfer is a viable treatment option for recurrent or refractory *C.*  
117 *difficile* colitis, without any noticeable side effects. Studies have confirmed that 6 weeks after gut  
118 microbiome transfer, the recipient's gut microbiome population structure resembles that of the donor<sup>21</sup>.

119  
120 Gut microbiome transfer is a possible treatment for obesity and metabolic syndrome<sup>22</sup>. To date,  
121 investigation of the therapeutic benefit of gut microbiome transfer in adult metabolic disease (obesity  
122 and metabolic syndrome) has been limited<sup>20</sup>. Vrieze et al. performed a short-term gut microbiome  
123 transfer study in 9 treated and 9 control middle-aged adults with metabolic syndrome<sup>20</sup>. Six weeks after  
124 gut microbiome transfer via naso-duodenal tube, treated recipients had an impressive 75% improvement  
125 in insulin sensitivity. Kootte et al. reported similar results at 6 weeks among 38 obese males (median  
126 age 56 years), but the improvements in both insulin sensitivity and gut microbiota composition reverted  
127 back to baseline at 18 weeks<sup>23</sup>. Conversely, our group (unpublished data) demonstrated that gut  
128 microbiome composition in recipients changed after gut microbiome transfer to mimic the lean donor's  
129 gut microbiome, and that this effect was sustained 26 weeks after treatment. This indirectly indicates  
130 that it is possible to change the gut microbiome, using a healthy donor, with possible concurrent health  
131 benefits.

132  
133 Selection of donors is critical for successful gut microbiome transfer. The adverse effect of an  
134 inappropriate donor was illustrated by a patient with chronic *C. difficile* colitis, who developed new-  
135 onset obesity following gut microbiome transfer from a healthy but overweight donor<sup>24</sup>. Notably, a  
136 similar result was observed when the microbiome from an obese human was transferred into a lean  
137 mouse<sup>25</sup>.

138  
139 Gut microbiome transfer is not considered a probiotic treatment<sup>26</sup>. Although gut microbiome transfer  
140 and probiotics involve the administration of live bacteria, this is where the similarities end. Probiotics  
141 are one of several defined live bacterial strains (e.g. *Bifidobacterium adolescentis*, *Lactobacillus*  
142 *acidophilus*, and *Lactobacillus casei*) that have been previously isolated and characterised<sup>26</sup>. The

143 rationale for this treatment is that these supplemental bacteria and products have been shown to confer  
144 general health benefits. Conversely, gut microbiome transfer consists of transferring the entire  
145 microbiome from a healthy donor to a recipient, in order to establish a healthier microbial community  
146 and ameliorate the undesirable underlying condition. Meta-analyses of randomised control studies of  
147 the effects of probiotics (*e.g. Lactobacillus* spp. and fermented milk-based probiotic treatments) on  
148 weight loss are conflicting<sup>27 28</sup>. There are currently no published studies of gut microbiome transfer for  
149 the treatment of human obesity. However, a study has shown that germ-free mice lose weight following  
150 gut microbiome transfer from mice who had gastric bypass surgery and exhibited rapid weight loss<sup>29</sup>. In  
151 addition, meta-analyses of the effectiveness of microbial transfers in the treatment of *C. difficile*<sup>30</sup> have  
152 demonstrated that gut microbiome transfer is efficacious and safe for inflammatory bowel disease  
153 (pooled cure rate 36%; 95% CI 17–60%)<sup>31</sup> and *C. difficile* (pooled cure rate 89%; 95% CI 84–93%)<sup>30</sup>.  
154 As such, gut microbiome transfer holds significant promise as a treatment for the rapid and concerted  
155 modification of an unhealthy gut microbiome, which we hypothesise will lead to weight loss in obese  
156 humans.

157  
158 This clinical trial will assess whether gut microbiome transfer using encapsulated material is an  
159 effective treatment for obesity in adolescents.

160

## 161 **METHODS AND ANALYSIS**

162

### 163 **Study design**

164

165 A two-arm, double-blind, placebo-controlled, randomised clinical trial with obese adolescents randomly  
166 assigned to either treatment (encapsulated gut microbiome) or placebo (encapsulated saline solution),  
167 stratified by sex. Eligible participants will be followed for 26 weeks post randomisation (Figure 1). This  
168 trial protocol is reported as per the SPIRIT guidelines<sup>32</sup>.

169

### 170 **Recruitment and eligibility criteria**

171

#### 172 *Donors*

173

174 We will recruit 8 donors (4 males and 4 females), as recipients will only receive gut microbiome from  
175 donors of the same sex. This is to enhance microbial variability and standardise the treatment via gut  
176 microbiome transfer. Treatment with gut microbiome from donors of the same sex will be done as there  
177 may be potentially sex-specific differences in the effect of gut microbiome on weight and metabolism  
178 as described by Markle et al.<sup>33</sup>. Donors will be selected based on strict inclusion criteria (Table 1).  
179 Eligible donors will be identified by word of mouth, the internal email system at the University of

180 Auckland, and social media networks. Potential donors will be given a detailed information sheet about  
181 the study that includes a consent form.

182  
183 To eliminate the risks of transmission of infectious diseases we will use screening procedures  
184 equivalent to those used for blood donation in New Zealand<sup>34</sup>, and also screen donors for potential  
185 faecal pathogens or multidrug-resistant organisms. As part of this regimen, all potential donors will  
186 undergo extensive testing for human pathogens, antigens, and antibodies (that indicate exposure to  
187 hepatitis A, B, or C viruses, and human immunodeficiency virus), syphilis, *C. difficile*, *Helicobacter*  
188 *pylori*, other bacterial and viral pathogens, multidrug-resistant organisms, as well as intestinal parasites.  
189 We will supplement these microbiological tests with characterisation of the gut microbiome through  
190 analysis of the metagenome and metatranscriptome<sup>35</sup>. In addition, we will conduct an interview to  
191 gather information about behaviours or activities that may exclude them from the trial (Table 1).

192  
193 Given evidence that irritable bowel syndrome (IBS) may be related to the gut microbiome, it is  
194 important to exclude potential donors who may have IBS. The Rome criteria are an accepted clinical  
195 tool to identify individuals with IBS, but they are relatively insensitive so that strict adherence to those  
196 criteria would potentially allow for individuals with mild IBS to donate<sup>36</sup>. Therefore, we will screen for  
197 IBS using a conservative modification of the Rome criteria, where we define a positive screen as having  
198 3 or more episodes of abdominal pain per month as described in part I of the criteria, as well as an  
199 additional symptom as defined in part II<sup>37</sup>.

200  
201 Each donor is expected to produce a wet stool sample weighing 100-150 g. Our preliminary laboratory  
202 data indicate that an average stool sample from a donor will generate sufficient gut microbiome material  
203 for two same-sex recipients. Stool samples will be collected and immediately processed for  
204 encapsulation. Capsules from each sample will be individually coded, so that each recipient will receive  
205 an equal number of capsules (n=7) from each of the four same sex donors.

206  
207 *Participants (recipients)*

208  
209 We will recruit 80 obese adolescents as per inclusion and exclusion criteria described in Table 2.  
210 Eligible recipients will be recruited via social media, word of mouth, and paediatric endocrinology  
211 clinics in Auckland. Potential recipients and caregivers will be given a detailed information sheet about  
212 the study that includes a consent form. Consent will be obtained from recipients if they are aged  $\geq 16$   
213 years and from their parents if aged  $< 16$  years. Younger recipients will also be asked to sign an assent  
214 form. All consent and/or assent will be obtained by the researchers prior to the recipient's participation  
215 in the trial. All potential and enrolled recipients' personal information are recorded and kept in a secure  
216 folder and only accessible to the researchers, in order to protect their confidentiality.

217

218 **Specimen collection**

219

220 The donor gut microbiome will be double encapsulated and administered to recipients by the oral route,  
221 which delivers bacteria to the proximal bowel. Thus, we will not require the use of invasive techniques  
222 (*i.e.* naso-duodenal tube) for gut microbiome transfer. Instead, gut microbiome transfer will be  
223 performed as per recent studies<sup>18 19</sup>, which demonstrated that an encapsulated microbiome was a viable  
224 treatment option for recurrent or refractory *C. difficile* colitis, without noticeable side effects.

225

226 We have validated methods for gut microbiome isolation, preparation, and double encapsulation as  
227 detailed by Youngster et al.<sup>18</sup>. Briefly, immediately after donation, stools are placed in normal saline,  
228 blended, and sieved to remove particulate matter. Samples are then differentially centrifuged to isolate a  
229 bacterial pellet. The bacterial pellet is suspended in normal saline (containing 15% glycerol – a  
230 cryoprotectant) at 0.5 g wet weight/ml before being dispensed into size 0 DRcaps<sup>TM</sup> capsules (Capsugel  
231 Inc, Sydney, Australia). The size 0 capsules are closed and secondarily sealed in size 00 DRcaps<sup>TM</sup>  
232 capsules. These capsules mask taste, odour, and visual appearance, and are designed to remain intact  
233 during passage through the stomach, delivering their contents to the intestine<sup>38-40</sup>. Capsules are stored  
234 frozen at -80°C.

235

236 The use of low-speed centrifugation to pellet the bacterial cells is a feature of this methodology that  
237 reduces the risk of having free viruses<sup>41</sup> included into the treatment capsules. Storage (-80°C, <175  
238 days<sup>18 19</sup>) of microbiome capsules provides time to complete rigorous safety testing using  
239 microbiological and microscopic analyses.

240

241 **Randomisation, allocation, and blinding**

242

243 Eligible participants will be randomised in a 1:1 ratio to either treatment or placebo group, stratified by  
244 sex, using block randomisation with variable block sizes of 2 and 4<sup>42</sup>. Randomisation sequences will be  
245 computer generated, and overseen by the biostatistician. Researchers and participants will be blinded to  
246 capsule contents, both of which (placebo and gut microbiome) look identical (white).

247

248 There are three steps in the blinding and allocation process. First, the independent research nurse  
249 allocates the recipient to group A or B using the randomisation sequence. Second, the placebo and  
250 treatment capsule packs each have a unique code (assigned by the technician who encapsulated them).  
251 Lastly, the independent research nurse allocates the pack according to the unique code associated with  
252 the randomisation sequence.

253

254 To maintain the integrity of the trial evaluation, statistical analyses will be performed at the completion  
255 of the study on encoded data (*i.e.* Group A *vs* Group B), so that the biostatistician will be blinded to  
256 treatment allocation. Recipients will be asked if they are able to identify the contents of capsules taken  
257 (*i.e.* placebo or gut microbiome) at 6 weeks and 26 weeks. The effectiveness of treatment blinding will  
258 be assessed using the Bang's blinding index<sup>43</sup>. Blinding success will be determined by the thresholds of  
259 Moroz et al.<sup>44</sup>: unblinded ( $BBI \geq 0.2$ ); random guesses ( $-0.2 < BBI < 0.2$ ); or opposite guesses ( $BBI \leq$   
260  $-0.2$ ).

261  
262 Recipients will be unblinded in the case of any serious adverse events. These include on-going  
263 gastrointestinal bleeding, severe vomiting and/or diarrhoea, treatment related systemic infection,  
264 treatment related severe allergic reaction, coma, collapse and death. Unblinding will be done by an  
265 independent researcher who did not have any prior contact with the recipient, who will be able to  
266 determine the individual's treatment allocation.

267

## 268 **Study intervention**

269

270 All recipients will undergo bowel cleansing prior to treatment using an oral solution containing 70 g of  
271 Glycoprep-C<sup>®</sup> (active ingredient macrogol 3350) (Fresenius Kabi Australia Pty Ltd., Mount Kuring-gai,  
272 Australia). Bowel cleansing reduces gut microbial population by 31-fold and markedly reduces bacterial  
273 diversity<sup>45</sup>. This procedure was used in a pilot study of gut microbiome transfer in adults with type 2  
274 diabetes<sup>20</sup>. Diminishing the undesirable microbial community means that the donor bacteria are more  
275 likely to become established in the recipient's bowel<sup>20</sup>.

276

277 Recipients will be advised to take the Glycoprep-C<sup>®</sup> solution between 4 pm and 6 pm the day before the  
278 treatment begins. It is expected that watery stools will follow for several hours to achieve bowel  
279 cleansing. Recipients will attend clinic early next morning, when each recipient in the placebo group  
280 will ingest saline capsules, while those in the treatment group will receive gut microbiome capsules.  
281 Each recipient will receive a total of 28 capsules (approximately 14 ml of frozen microbial suspension  
282 or saline) administered over two consecutive mornings under direct supervision from research staff<sup>18</sup>,  
283 specifically 16 capsules in the first morning and 12 capsules in the second morning. Recipients will be  
284 fasting overnight for at least 8 hours prior to taking each set of capsules at clinic in the following  
285 morning. Capsules will be stored at  $-80^{\circ}\text{C}$ , and later transferred into a freezer at  $-30^{\circ}\text{C}$  in the morning of  
286 administration. Immediately before administration, treatment capsules will be placed onto gel packs at  
287  $4^{\circ}\text{C}$  to prevent harm to recipients upon swallowing. After treatment, all recipients will remain fasting  
288 for another 2 hours. Recipients will be advised not to change their diet, physical activity, and behaviour  
289 during the trial. All recipients will receive the same number of capsules from the four same-sex donors



290 to standardized treatment and to ensure that overall donor microbiome diversity is increased and  
291 delivered in a reproducible fashion.

292

293

## 294 **Data collection and follow-up**

295

### 296 *Timing of assessments*

297

298 Recipients will be assessed four times over the course of the study: at baseline, 6 weeks, 12 weeks, and  
299 26 weeks. Longitudinal follow-up over 26 weeks will establish the duration of the effect. The specific  
300 assessments that will be carried out at each time point are outlined in Table 3. Treatment (*i.e.* intake of  
301 capsules) will be administered within a week of the baseline assessment.

302

303 Clinical assessments will start between 07:00 am and 09:00 am at the Maurice & Agnes Paykel Clinical  
304 Research Unit (Liggins Institute, University of Auckland), after an overnight fast and no strenuous  
305 activity over the previous 24 hours.

306

307 All the recipients will be contacted and reminded of their follow-up visits via emails and text messages.  
308 Any recipient having difficulties to attend their assessment visit will be given the option to re-schedule  
309 it to a suitable time.

310

### 311 *Insulin sensitivity and other blood tests*

312

313 Insulin sensitivity will be assessed in all recipients using the Matsuda index from a 75-g oral glucose  
314 tolerance test (OGTT)<sup>46</sup>. Blood samples will be collected at -10, 0, 30, 60, 90, and 120 minutes for  
315 glucose and insulin measurements. The Matsuda index is highly correlated with the hyperinsulinaemic  
316 euglycaemic clamp (the gold-standard assessment of insulin sensitivity<sup>47</sup>) and has excellent  
317 reproducibility during multiple measures<sup>48</sup>. Other markers of glycaemic control will also be measured,  
318 namely homeostasis model assessment of insulin resistance (HOMA-IR)<sup>49</sup> and glycated haemoglobin  
319 (HbA1c).

320

### 321 *Other blood tests*

322

323 Fasting blood samples will be taken during the insulin sensitivity assessment to measure a number of  
324 other parameters. These will include markers of metabolic syndrome, such as uric acid, high-sensitivity  
325 C-reactive protein (hsCRP), and fasting lipids (*i.e.* total cholesterol, high-density lipoprotein cholesterol  
326 [HDL-C], low-density lipoprotein cholesterol [LDL-C], and triglycerides). Liver function will be

327 assessed by measurement of gamma-glutamyl transferase (GGT), alkaline phosphatase (ALP), alanine  
328 aminotransferase (ALT), and aspartate transaminase (AST).

329

### 330 *Anthropometry and body composition*

331

332 Height will be measured to the nearest mm using a Harpenden stadiometer. Recipients will be asked to  
333 undo any hairstyle that might interfere with the measurements; they will stand with their feet together,  
334 with their back straight, and their heels in the same upright plane as the back of the head. Gentle upward  
335 traction on the mastoid process will be applied to straighten out the spine. Weight will be measured on a  
336 weighing scale (WM206, Wedderburn, Auckland, New Zealand) to the nearest 10 g. For weight  
337 measurements, the scale will be placed on a solid level floor, with recipients stepping on it with both  
338 feet at its centre. Both height and weight will be measured three times and the median value used for  
339 analysis; recipients will also be asked to remove shoes and bulky clothing, and to empty their pockets of  
340 any objects. Both the scale and stadiometer at our clinical research unit are checked on a weekly basis  
341 using the appropriate standards.

342

343 BMI will be calculated and transformed into standard deviations scores (SDS) adjusted for age and sex,  
344 based on WHO standards<sup>50</sup>. Waist and hip circumferences will be measured as per guidelines from the  
345 World Health Organization<sup>51</sup>. Both the waist and hip circumference measurements will be performed  
346 three times and the median value used for analysis. Both measurements will be made to the nearest mm  
347 with a standard measuring tape parallel to the floor, which is placed snugly around the recipient but  
348 without compressing the skin<sup>52</sup>. Body composition will be assessed using whole-body dual-energy X-  
349 ray absorptiometry (DXA, Lunar Prodigy<sup>TM</sup> and Lunar iDXA<sup>TM</sup>, GE Medical Systems, Chicago,  
350 Illinois, USA). Recipients will have all longitudinal body composition data collected on the same  
351 device.

352

### 353 *Blood pressure*

354

355 Clinic resting systolic and diastolic blood pressures will be measured at all assessments using the same  
356 oscillometric digital blood pressure monitor (ri-champion<sup>®</sup> N; Riester, Jungingen, Germany) with an  
357 appropriately-sized cuff on the extended non-dominant arm. All measurements will be recorded on each  
358 recipient while seated and after a 5-minute rest. Blood pressure will be measured three times, and the  
359 median value used for analysis.

360

361 In addition, 24-hour ambulatory blood pressure monitoring will be performed at baseline and at 6  
362 weeks, using an oscillometric device (Spacelabs 90217; Spacelabs Medical Inc, Redmond, Washington,  
363 USA) on the non-dominant arm. Over a 24-hour period, blood pressure will be measured every 20

364 minutes when the recipients are expected to be awake, and every 30 minutes when they are likely to be  
365 asleep (based on self-reported information). Recipients will be asked to record the time they go to bed  
366 and the time they wake up over the period of monitoring, so that waking and sleeping times can be  
367 more accurately identified.

368

#### 369 *Dietary intake*

370

371 A dietary record describing all foods and fluids consumed over three days will be collected at the 6-  
372 week assessment. Recipients will be asked to describe all foods and fluids consumed in detail including  
373 brand names, types of foods (e.g. low fat), and cooking methods. Quantities will be described using  
374 standard household measures, as well as the information from food labels (where appropriate).  
375 Recipients will be provided with standardized instructions for completing the dietary record by a trained  
376 investigator, who will also review individual records with recipients to clarify errors, omissions,  
377 questionable entries, or unclear descriptions. These dietary records will be entered into FoodWorks  
378 software (v9.0, Xyris Software, Brisbane, Australia) by a trained investigator.

379

380 The New Zealand Adolescent Food Frequency Questionnaire (NZAFFQ)<sup>53</sup> will be administered at  
381 baseline and weeks 6, 12, and 26. The NZAFFQ was developed for and validated in New Zealand  
382 adolescents aged 14 to 18 years<sup>53</sup>.

383

#### 384 *Physical activity levels*

385

386 These will be measured using two questionnaires:

387

388 • International Physical Activity Questionnaire (IPAQ)<sup>54</sup> – it covers four domains of physical activity,  
389 namely work-related, transportation, housework/gardening, and leisure time.

390

391 • Adolescent Sedentary Activity Questionnaire (ASAQ)<sup>55</sup> – it covers a number of sedentary activities  
392 across five categories (small screen recreation, education, travel, cultural activities, and social  
393 activities).

394

#### 395 *Health-related quality of life*

396

397 This will be assessed using:

398

399 • EPOCH Measure of Adolescent Well-Being<sup>56</sup> – it provides an assessment of five positive  
400 psychological characteristics (engagement, perseverance, optimism, connectedness, and happiness).

401  
402 • Pediatric Quality of Life Inventory (PedsQL)<sup>57</sup> – we will adopt only the teen and young adult self-  
403 reports (*i.e.* not the parent-proxy), which assess problems over the preceding month relating to physical,  
404 emotional, social, and school functioning.

405  
406 In addition, we will assess symptoms of irritable bowel syndrome<sup>58</sup> and bowel movements using the  
407 Birmingham IBS symptom questionnaire and bowel movements questionnaire respectively. The  
408 Birmingham IBS symptom questionnaire is a self-administered 11-item symptom questionnaire that is  
409 scored using the Rome II criteria<sup>58</sup>. The bowel movement questionnaire was designed for this trial to  
410 assess and monitor changes pre and post treatment.

411  
412 *Gut microbial composition*

413  
414 Sample collection will be performed at baseline prior to treatment and at 6 weeks, 12 weeks and 26  
415 weeks post-treatment. Briefly, the participant will be given the bedpan liner (Onelink). They will be  
416 asked to: i) pass urine into the toilet prior to placing the tray on the toilet seat; ii) pass the stools; iii)  
417 cover the tray and leave it in the bathroom for immediate collection by a research team member. Using  
418 a small spatula, samples will be collected from three different areas of the stool (proximal, middle, and  
419 distal) and inserted into specimen containers (Onelink). The specimen containers will be immediately  
420 placed on ice and taken to the laboratory where they will be frozen and stored at -80°C. DNA and RNA  
421 extraction will be completed within 5 days of donation. Time to processing will be recorded.

422  
423 Note that we will advise participants to try not to have a bowel movement in the morning prior to their  
424 visit, having it in the clinic instead. For those participants who are unable to produce a stool sample  
425 during their visit, they will be provided with a stool collection kit to take home and detailed instructions  
426 on how to collect the stool sample. This kit is made up of: i) instructions on how to use the stool  
427 collection kit; ii) specimen container; and iii) bedpan liner. Once the stool has been collected in the  
428 home environment, the specimen container it should be immediately placed into their home freezer, and  
429 kept there until it is delivered to the research team.

430  
431 All extractions will be performed using Qiagen-AllPrep DNA/RNA mini kit®, due to variation in  
432 extraction efficiencies with the different kits<sup>59</sup>. However, once the DNA or RNA is extracted and  
433 archived, we will have a relatively stable record of the composition and activity of the flora.

434  
435 Frozen faeces (~200 mg; weights will be recorded) will be subsampled from original faecal samples.  
436 All DNA and RNA isolations will be performed in a disinfected class II hood at room temperature.  
437 Briefly, stool samples will be incubated (10 min, room temperature) with vortexing (30 sec every 2

438 minutes) and treated with RLT Plus buffer (1.2mL; Qiagen) and 12µL beta-mercaptoethanol (Sigma-  
439 Aldrich). Acid-washed glass beads [1 ml; ≤106 µm (-140 U.S. sieve) (Sigma-Aldrich)] will be added to  
440 each sample and vortexed (10 min) on a TissueLyzer II (Qiagen). The supernatant will be removed and  
441 added to a QIAshredder spin column (Qiagen) and centrifuged (9000 rpm, 2 min, room temperature).  
442 The eluent will be added to an AllPrep DNA (Qiagen) spin column and centrifuged (30 sec, 14000 rpm,  
443 room temperature). The eluent and AllPrep DNA spin columns will be used for RNA and DNA  
444 extraction, respectively, according to the manufacturer's instructions. Finally, DNA and RNA will be  
445 eluted with EB buffer and RNase-free water, respectively, and aliquots stored at -80°C for downstream  
446 mixed omics analysis.

447  
448 A series of blank samples (sterile saline) will be extracted in parallel to sample extractions to enable  
449 contamination testing. We will also extract ZymoBIOMICS™ Microbial Community Standard I (Even,  
450 Cellular Mix; Catalog #D6300) to determine potential bias in the extraction process.

451  
452 For 16S amplicon sequencing, library preparation will be performed using an Illumina platform by a  
453 commercial provider (to be determined) using standard protocols for the SV3-4 region. Shotgun  
454 metagenomics sequencing will be performed by a commercial provider (to be determined).

455  
456 All raw sequencing files will be cleaned to remove adaptors and primer sequences, and trimmed for  
457 sequence quality (Phred score<30).

458  
459 Longitudinal analysis of gut microbiome data (i.e. change in alpha and beta diversity from baseline to  
460 26 weeks in treatment and placebo group) will be performed on Qiime2 (version 2018.4 or later) using  
461 default parameters<sup>60</sup>. PERMANOVA and Multivariate Association with Linear Models using MaAsLin  
462 (version 0.0.4; or later)<sup>61</sup> will be used to identify any significant differences in gut microbial  
463 communities and structure between treatment groups.

464  
465 Metagenomic sequencing data will be analysed using default parameters of the HMP Unified Metabolic  
466 Analysis NEtwork (HuMAN2) (version 2; or later)<sup>62</sup> after removal of short reads (minimum length 50  
467 bases, trimmomatic version 0.33 or later<sup>63</sup>) and human sequences using BMTagger<sup>64</sup>. MaAsLin  
468 (version 0.0.4; or later)<sup>61</sup> will be used to identify significant associations between microbial  
469 compositions, metabolomics data, and microbial functions.

470  
471 **Safety monitoring**

472  
473 An independent safety monitoring committee has been established. All recipients are advised to remain  
474 under supervision in the clinical research unit for one hour after initial treatment and we will adopt

475 robust exclusion and screening criteria for donors (as previously described). In addition, recipients' data  
476 will be monitored by the research team and the safety committee throughout the study for any adverse  
477 events, in particular gastrointestinal symptoms and possible allergies. All potential adverse events will  
478 be recorded. If any recipient suffers harm as a result of trial participation, they will be eligible to apply  
479 for compensation from the Accident Compensation Cooperation (ACC), which is a compulsory  
480 insurance cover for personal injury for everyone in New Zealand.

481  
482 If any concerns are identified during screening or clinical assessment of donors or recipients, further  
483 clinical evaluation and/or investigation will be immediately undertaken. If concerns are identified  
484 during the study, the recipient will be withdrawn if this is thought to be in their best interest.

485

## 486 **Outcome measures**

487

### 488 *Primary outcome*

489

- 490 • BMI SDS at 6 weeks.

491

### 492 *Secondary outcomes*

- 493 • BMI SDS at 12, and 26 weeks
- 494 • total body fat percentage (from DXA) at 6, 12, and 26 weeks
- 495 • insulin sensitivity at 6, 12, and 26 weeks
- 496 • gut microbial composition at 6, 12, and 26 weeks
- 497 • liver function at 6, 12, and 26 weeks
- 498 • lipid profile at 6, 12, and 26 weeks
- 499 • inflammatory markers [uric acid, high-sensitivity C-reactive protein (hsCRP)] at 6, 12, and 26 weeks
- 500 • blood pressure at 6, 12, and 26 weeks
- 501 • health-related quality of life at 6, 12, and 26 weeks
- 502 • IBS symptoms at 6, 12, and 26 weeks
- 503 • bowel movements at 6, 12, and 26 weeks

504

## 505 **Sample size and power calculation**

506

507 Power calculation was based on data from a cohort of 50 obese adolescents in Australia aged 14–18  
508 years, with a pooled mean BMI SDS of 2.5 and standard deviation of 0.27 at baseline<sup>65</sup>. A study with 32  
509 recipients per group will have 80% power at 5% significance level (two-sided) to detect a group  
510 difference of 0.19 in BMI SDS at 6 weeks after gut microbiome transfer, which is equivalent to a

511 difference in weight of approximately 2 kg. To account for an approximate 20% loss to follow-up, we  
512 aim to recruit 40 treatment and 40 control recipients.

513

#### 514 **Data management**

515

516 All data collected will be entered and stored in password-protected web-based platforms. Rules for data  
517 validation will be in place to minimize human error, and all data entered by members of the research  
518 team will be double-checked by the database administrator to ensure accuracy of stored records. Only  
519 the researchers involved in the trial will have access to the final trial dataset.

520

#### 521 **Statistical analyses**

522

523 Treatment evaluation will be performed on the principle of intention to treat, using data collected from  
524 all randomised recipients. Baseline demographics and clinical characteristics of recipients will be  
525 summarised by randomised group. The distribution of outcome measures will be first evaluated at  
526 scheduled visits using descriptive statistics. Generalised linear regression models will be used to assess  
527 the main treatment effects between groups, adjusting for the baseline outcome value <sup>66</sup> and sex  
528 (stratification factor). Model-adjusted estimates and the differences between the two groups will be  
529 calculated with 95% confidence intervals. Random effects mixed models will be used to evaluate the  
530 outcomes measured repeatedly over time, controlling for correlated data collected from the same  
531 recipient. Planned subgroup analysis by sex will be conducted on primary and secondary outcomes to  
532 evaluate the consistency of main treatment effects in males and females, by including an interaction  
533 term between sex and treatment group in the main model. If a significant interaction effect is found,  
534 separately subgroup analyses will be conducted to estimate the treatment effects in specific subgroups.

535

536 Missing data on the primary outcome will be imputed using multiple imputations, which create multiple  
537 imputed datasets for the incomplete outcome variable that are analyzed using same regression models  
538 and combined for one inference. The Markov chain Monte Carlo (MCMC) method will be used to  
539 produce the parameter estimates, assuming the data are from a multivariate normal distribution and are  
540 missing at random. The SAS procedure, PROC MI, will be used which runs 200 iterations of the  
541 algorithm before selecting the first completed data set, and then allows 100 iterations between each  
542 successive data set. The default minimum number of imputations is 5, and we plan to run 30 to allow  
543 for both within and between imputation variances.

544

545 Per-protocol analyses will be carried out on those recipients without major protocol violations. A  
546 protocol deviation form will be used to record all major protocol deviations, and reviewed in a blinded  
547 fashion by the trial steering group prior to final data lock. The per-protocol population will be analysed

548 using same regression models as the primary intention-to-treat (ITT) population to test the robustness of  
549 main trial findings.

550  
551 Our secondary analyses will include the examination of potential effects of diet (e.g. fibre intake) and  
552 physical activity levels on study outcomes. Data analyses will be performed in SAS v.9.4 (SAS  
553 Institute, Cary, NC, USA), SPSS v25 (IBM Corp, Armonk, NY, USA), and/or Minitab v.16  
554 (Pennsylvania State University, State College, PA, USA). All statistical tests will be two-sided at  
555  $p < 0.05$ , with no adjustments for multiple comparisons. The CONSORT 2010 guidelines will be  
556 followed in reporting the main trial results.

### 557 558 **Study status**

559  
560 The recruitment of recipients for the trial began in Oct 2017. It is expected that the study will be  
561 completed in mid-2019.

### 562 563 **Patient and public involvement**

564  
565 Public input into the study design was provided in open meetings by the Northern A Health and  
566 Disability Ethics Committee, whose membership includes both clinical and lay persons, as well as  
567 Māori representatives (New Zealand indigenous people). Information on the trial was subsequently  
568 made available on social media platforms (e.g. Facebook), which allowed participants to read and  
569 contact the researchers if they wanted to participate. Participants were not involved in the development,  
570 recruitment of other participants, or conduct of the trial. All recipients will be asked about any possible  
571 adverse effects of treatment at specific time points throughout the trial; if any serious adverse effects are  
572 reported, a thorough follow-up will be conducted to investigate the incident. After completion of data  
573 analyses, all recipients will receive information about their individual results.

### 574 575 **ETHICS AND DISSEMINATION**

576  
577 Ethics approval for this study was granted in November 2016 by the Northern A Health and Disability  
578 Ethics Committee (Ministry of Health, New Zealand; 16/NTA/172). Involvement in this trial will be  
579 entirely voluntary. If a recipient agrees to take part, they will be free to withdraw from the study at any  
580 time. In addition, the participant will be withdrawn if the research team believes their ongoing  
581 involvement in the study is not in their best interest. Donors and recipients will be required to provide  
582 written informed consent prior to participation in the study. The Ethics Committee requires that a yearly  
583 progress report is submitted, which must disclose any protocol violations.

584



585 Clinical and biochemical data will be entered into secure databases protected by passwords, with access  
586 restricted to investigators. Recipients and caregivers will be informed of incidental findings on  
587 unrecognized conditions (*e.g.* diabetes), with further medical follow-up arranged. Importantly, if at the  
588 end of the trial we find that gut microbiome transfer leads to a statistically significant improvement in  
589 key health outcomes, the treatment will be offered to all recipients who received placebo. Recipients  
590 and caregivers will also be provided with information on individual results.

591  
592 Communication to the scientific community will be through high-profile international research  
593 meetings, as well as relevant national and regional meetings. We aim to publish findings in high-impact  
594 peer-reviewed international journals. Further, the research team will communicate the findings to the  
595 general public in New Zealand and overseas through our institution's Communications Manager.  
596 Relevant findings will be shared with the community in a culturally appropriate manner.

597

## 598 **REGISTRATION DETAILS**

599

600 This study is registered with the Australian New Zealand Clinical Trials Registry (ACTRN:  
601 ACTRN12615001351505). In addition, the Universal Trial Number (UTN), World Health  
602 Organization, has been obtained (U1111-1176-6753).

603

604 **Author contributions:** WSC, JMO, JGBD, KSWL, BBA, VC, DJH, DMS, TNJ, YJ, KLB, CAC, WS,  
605 and TV contributed to the conception and design of the study. KSWL, JGBD, WSC, JMO, TNJ, BBA,  
606 and VC drafted the protocol with input from all other authors.

607

608 **Acknowledgements:** We thank Wendy Ranson, Yara Gerber, and Janene Biggs for their valuable  
609 assistance during the development of this trial, and Khan Safayet Hossin for help with the database.

610

611 **Funding:** This research received funding from the Rockfield Trust and A Better Start – National  
612 Science Challenge. VC was supported by a Long-Term Research Fellowship from the European Society  
613 for Paediatric Endocrinology (ESPE), TNJ received a University of Auckland Scholarship, and BBA is  
614 supported by a Maurice Paykel Research Fellowship.

615

616 **Competing interests:** None declared.

617

## 618 **REFERENCES**

619

620 1. World Health Organization. Ending Childhood Obesity Report of The Commission on Ending  
621 Childhood Obesity. Geneva, 2016.

- 622 2. The NS, Suchindran C, North KE, *et al.* Association of adolescent obesity with risk of severe obesity  
623 in adulthood. *JAMA* 2010;304:2042-7.
- 624 3. Guo SS, Roche AF, Chumlea WC, *et al.* The predictive value of childhood body mass index values  
625 for overweight at age 35 y. *Am J Clin Nutr* 1994;59:810-9.
- 626 4. Halfon N, Larson K, Slusser W. Associations between obesity and comorbid mental health,  
627 developmental, and physical health conditions in a nationally representative sample of US children  
628 aged 10 to 17. *Academic Pediatr* 2013;13:6-13.
- 629 5. Engeland A, Bjorge T, Sogaard AJ, *et al.* Body mass index in adolescence in relation to total  
630 mortality: 32-year follow-up of 227,000 Norwegian boys and girls. *Am J Epidemiol* 2003;157:517-  
631 23.
- 632 6. Twig G, Yaniv G, Levine H, *et al.* Body-mass index in 2.3 million adolescents and cardiovascular  
633 death in adulthood. *N Engl J Med* 2016;374:2430-40.
- 634 7. Burcelin R, Serino M, Chabo C, *et al.* Metagenome and metabolism: the tissue microbiota  
635 hypothesis. *Diabetes Obes Metab* 2013;15:61-70.
- 636 8. Musso G, Gambino R, Cassader M. Obesity, diabetes, and gut microbiota: the hygiene hypothesis  
637 expanded? *Diabetes Care* 2010;33:2277-84.
- 638 9. Backhed F, Ding H, Wang T, *et al.* The gut microbiota as an environmental factor that regulates fat  
639 storage. *Proc Natl Acad Sci U S A* 2004;101:15718-23.
- 640 10. Turnbaugh PJ, Backhed F, Fulton L, *et al.* Diet-induced obesity is linked to marked but reversible  
641 alterations in the mouse distal gut microbiome. *Cell Host Microbe* 2008;3:213-23.
- 642 11. Backhed F, Manchester JK, Semenkovich CF, *et al.* Mechanisms underlying the resistance to diet-  
643 induced obesity in germ-free mice. *Proc Natl Acad Sci U S A* 2007;104:979-84.
- 644 12. Turnbaugh PJ, Ridaura VK, Faith JJ, *et al.* The effect of diet on the human gut microbiome: a  
645 metagenomic analysis in humanized gnotobiotic mice. *Sci Transl Med* 2009;1:6ra14.
- 646 13. Dumas ME, Barton RH, Toye A, *et al.* Metabolic profiling reveals a contribution of gut microbiota  
647 to fatty liver phenotype in insulin-resistant mice. *Proc Natl Acad Sci U S A* 2006;103:12511-6.
- 648 14. Ma J, Zhou Q, Li H. Gut microbiota and nonalcoholic fatty liver disease: Insights on mechanisms  
649 and therapy. *Nutrients* 2017;9
- 650 15. Evans JM, Morris LS, Marchesi JR. The gut microbiome: the role of a virtual organ in the  
651 endocrinology of the host. *J Endocrinol* 2013;218:R37-47.
- 652 16. Hota SS, Achonu C, Crowcroft NS, *et al.* Determining mortality rates attributable to *Clostridium*  
653 *difficile* infection. *Emerg Infect Dis* 2012;18:305-7.
- 654 17. van Nood E, Vrieze A, Nieuwdorp M, *et al.* Duodenal infusion of donor feces for recurrent  
655 *Clostridium difficile*. *N Engl J Med* 2013;368:407-15.
- 656 18. Youngster I, Russell GH, Pindar C, *et al.* Oral, capsulized, frozen fecal microbiota transplantation  
657 for relapsing *Clostridium difficile* infection. *JAMA* 2014;312:1772-8.

- 658 19. Hirsch BE, Saraiya N, Poeth K, *et al.* Effectiveness of fecal-derived microbiota transfer using orally  
659 administered capsules for recurrent *Clostridium difficile* infection. *BMC Infect Dis* 2015;15:191.
- 660 20. Vrieze A, Van Nood E, Holleman F, *et al.* Transfer of intestinal microbiota from lean donors  
661 increases insulin sensitivity in individuals with metabolic syndrome. *Gastroenterology*  
662 2012;143:913-6 e7.
- 663 21. Weingarden A, Gonzalez A, Vazquez-Baeza Y, *et al.* Dynamic changes in short- and long-term  
664 bacterial composition following fecal microbiota transplantation for recurrent *Clostridium difficile*  
665 infection. *Microbiome* 2015;3:10.
- 666 22. Walker AW, Parkhill J. Microbiology. Fighting obesity with bacteria. *Science* 2013;341:1069-70.
- 667 23. Kootte RS, Levin E, Salojarvi J, *et al.* Improvement of insulin sensitivity after lean donor feces in  
668 metabolic syndrome is driven by baseline intestinal microbiota composition. *Cell Metab*  
669 2017;26:611-19.e6.
- 670 24. Alang N, Kelly CR. Weight gain after fecal microbiota transplantation. *Open Forum Infect Dis*  
671 2015;2:ofv004.
- 672 25. Ridaura VK, Faith JJ, Rey FE, *et al.* Gut microbiota from twins discordant for obesity modulate  
673 metabolism in mice. *Science* 2013;341:1241214.
- 674 26. Hill C, Guarner F, Reid G, *et al.* Expert consensus document. The International Scientific  
675 Association for Probiotics and Prebiotics consensus statement on the scope and appropriate use of  
676 the term probiotic. *Nat Rev Gastroenterol Hepatol* 2014;11:506-14.
- 677 27. Park S, Bae JH. Probiotics for weight loss: a systematic review and meta-analysis. *Nutr Res*  
678 2015;35:566-75.
- 679 28. Sun J, Buys N. Effects of probiotics consumption on lowering lipids and CVD risk factors: A  
680 systematic review and meta-analysis of randomized controlled trials. *Ann Med* 2015;47:430-40.
- 681 29. Liou AP, Paziuk M, Luevano JM, Jr., *et al.* Conserved shifts in the gut microbiota due to gastric  
682 bypass reduce host weight and adiposity. *Sci Transl Med* 2013;5:178ra41.
- 683 30. Kassam Z, Lee CH, Yuan Y, *et al.* Fecal microbiota transplantation for *Clostridium difficile*  
684 infection: systematic review and meta-analysis. *Am J Gastroenterol* 2013;108:500-8.
- 685 31. Colman RJ, Rubin DT. Fecal microbiota transplantation as therapy for inflammatory bowel disease:  
686 a systematic review and meta-analysis. *J Crohns Colitis* 2014;8:1569-81.
- 687 32. Chan AW, Tetzlaff JM, Altman DG, *et al.* SPIRIT 2013 statement: defining standard protocol items  
688 for clinical trials. *Ann Intern Med* 2013;158:200-7.
- 689 33. Markle JG, Frank DN, Mortin-Toth S, *et al.* Sex differences in the gut microbiome drive hormone-  
690 dependent regulation of autoimmunity. *Science* 2013;339:1084-88.
- 691 34. New Zealand Blood Service. Detailed eligibility criteria. 2015.
- 692 35. Bibby K, Peccia J. Identification of viral pathogen diversity in sewage sludge by metagenome  
693 analysis. *Environ Sci Technol* 2013;47:1945-51.

- 694 36. Lacy BE, Patel NK. Rome criteria and a diagnostic approach to irritable bowel syndrome. *J Clin*  
695 *Med* 2017;6:E99.
- 696 37. Vanner SJ, Depew WT, Paterson WG, *et al.* Predictive value of the Rome criteria for diagnosing the  
697 irritable bowel syndrome. *Am J Gastroenterol* 1999;94:2912-7.
- 698 38. Marzorati M, Possemiers S, Verhelst A, *et al.* A novel hypromellose capsule, with acid resistance  
699 properties, permits the targeted delivery of acid-sensitive products to the intestine. *LWT Food Sci*  
700 *Technol* 2015;60:544-51.
- 701 39. Miller DS, Parsons AM, Bresland J, *et al.* A simple and inexpensive enteric-coated capsule for  
702 delivery of acid-labile macromolecules to the small intestine. *J Zhejiang Univ-Sci B* 2015;16:586-  
703 92.
- 704 40. Amo R. DRcaps® capsules achieve delayed release properties for nutritional ingredients in human  
705 clinical study: Capsugel Inc, 2014.
- 706 41. Bourdin G, Schmitt B, Marvin Guy L, *et al.* Amplification and purification of T4-like *Escherichia*  
707 *coli* phages for phage therapy: from laboratory to pilot scale. *Appl Environ Microbiol*  
708 2014;80:1469-76.
- 709 42. Sealed Envelope Ltd. Create a blocked randomisation list 2016 [Available from:  
710 <https://www.sealedenvelope.com/simple-randomiser/v1/lists> accessed 3 Mar 2017.
- 711 43. Bang H, Ni L, Davis CE. Assessment of blinding in clinical trials. *Control Clin Trials* 2004;25:143-  
712 56.
- 713 44. Moroz A, Freed B, Tiedemann L, *et al.* Blinding measured: a systematic review of randomized  
714 controlled trials of acupuncture. *Evid Based Complement Alternat Med* 2013;2013:708251.
- 715 45. Jalanka J, Salonen A, Salojarvi J, *et al.* Effects of bowel cleansing on the intestinal microbiota. *Gut*  
716 2015;64:1562-8.
- 717 46. Matsuda M, DeFronzo RA. Insulin sensitivity indices obtained from oral glucose tolerance testing:  
718 comparison with the euglycemic insulin clamp. *Diabetes Care* 1999;22:1462-70.
- 719 47. Lorenzo C, Haffner SM, Stančáková A, *et al.* Relation of direct and surrogate measures of insulin  
720 resistance to cardiovascular risk factors in nondiabetic finnish offspring of type 2 diabetic  
721 individuals. *J Clin Endocrinol Metab* 2010;95:5082-90.
- 722 48. Maki KC, Rains TM, Dicklin MR, *et al.* Repeatability of indices of insulin sensitivity and secretion  
723 from standard liquid meal tests in subjects with type 2 diabetes mellitus or normal or impaired  
724 fasting glucose. *Diabetes Technol Ther* 2010;12:895-900.
- 725 49. Wallace TM, Levy JC, Matthews DR. Use and abuse of HOMA modeling. *Diabetes Care*  
726 2004;27:1487-95.
- 727 50. de Onis M, Onyango AW, Borghi E, *et al.* Development of a WHO growth reference for school-  
728 aged children and adolescents. *Bull World Health Organ* 2007;85:660-7.
- 729 51. World Health Organization. Waist circumference and waist-hip ratio: report of a WHO expert  
730 consultation, Geneva, 8–11 December 2008. Geneva, 2008.

- 731 52. National Center for Health Statistics. National Health and Nutrition Examination Survey III - Body  
732 Measurements (Anthropometry). Rockville, MD, USA: Centers for Disease Control and  
733 Prevention, 1988.
- 734 53. Wong JE, Parnell WR, Black KE, *et al.* Reliability and relative validity of a food frequency  
735 questionnaire to assess food group intakes in New Zealand adolescents. *Nutr J* 2012;11:65.
- 736 54. Hagstromer M, Oja P, Sjostrom M. The International Physical Activity Questionnaire (IPAQ): a  
737 study of concurrent and construct validity. *Public Health Nutr* 2006;9:755-62.
- 738 55. Hardy LL, Booth ML, Okely AD. The reliability of the Adolescent Sedentary Activity  
739 Questionnaire (ASAQ). *Prev Med* 2007;45:71-4.
- 740 56. Kern ML, Benson L, Steinberg EA, *et al.* The EPOCH Measure of Adolescent Well-Being. *Psychol*  
741 *Assess* 2016;28:586-97.
- 742 57. Varni JW, Seid M, Knight TS, *et al.* The PedsQL 4.0 Generic Core Scales: sensitivity,  
743 responsiveness, and impact on clinical decision-making. *J Behav Med* 2002;25:175-93.
- 744 58. Roalfe AK, Roberts LM, Wilson S. Evaluation of the Birmingham IBS symptom questionnaire.  
745 *BMC Gastroenterol* 2008;8:30.
- 746 59. Claassen S, du Toit E, Kaba M, *et al.* A comparison of the efficiency of five different commercial  
747 DNA extraction kits for extraction of DNA from faecal samples. *J Microbiol Methods*  
748 2013;94:103-10.
- 749 60. Caporaso JG, Kuczynski J, Stombaugh J, *et al.* QIIME allows analysis of high-throughput  
750 community sequencing data. *Nature Methods* 2010;7:335.
- 751 61. Morgan XC, Tickle TL, Sokol H, *et al.* Dysfunction of the intestinal microbiome in inflammatory  
752 bowel disease and treatment. *Genome Biol* 2012;13:R79.
- 753 62. Franzosa EA, McIver LJ, Rahnavaard G, *et al.* Species-level functional profiling of metagenomes  
754 and metatranscriptomes. *Nature Methods* 2018:1.
- 755 63. Bolger AM, Lohse M, Usadel B. Trimmomatic: a flexible trimmer for Illumina sequence data.  
756 *Bioinformatics* 2014;30:2114-20.
- 757 64. Rotmistrovsky K, Agarwala R. BMTagger: Best Match Tagger for removing human reads from  
758 metagenomics datasets. Key: citeulike:9207261; 2011
- 759 65. O'Brien PE, Sawyer SM, Laurie C, *et al.* Laparoscopic adjustable gastric banding in severely obese  
760 adolescents: a randomized trial. *JAMA* 2010;303:519-26.
- 761 66. Committee for Medicinal Products for Human Use. Guideline on adjustment for baseline covariates  
762 in clinical trials. Report EMA/CHMP/295050/2013. London: European Medicines Agency, 2015.
- 763 67. Bakken JS, Borody T, Brandt LJ, *et al.* Treating *Clostridium difficile* infection with fecal microbiota  
764 transplantation. *Clin Gastroenterol Hepatol* 2011;9:1044-9.

765  
766

767 **Figure 1.** Diagram showing flow of participants (recipients) in the Gut Bugs Trial.  
768

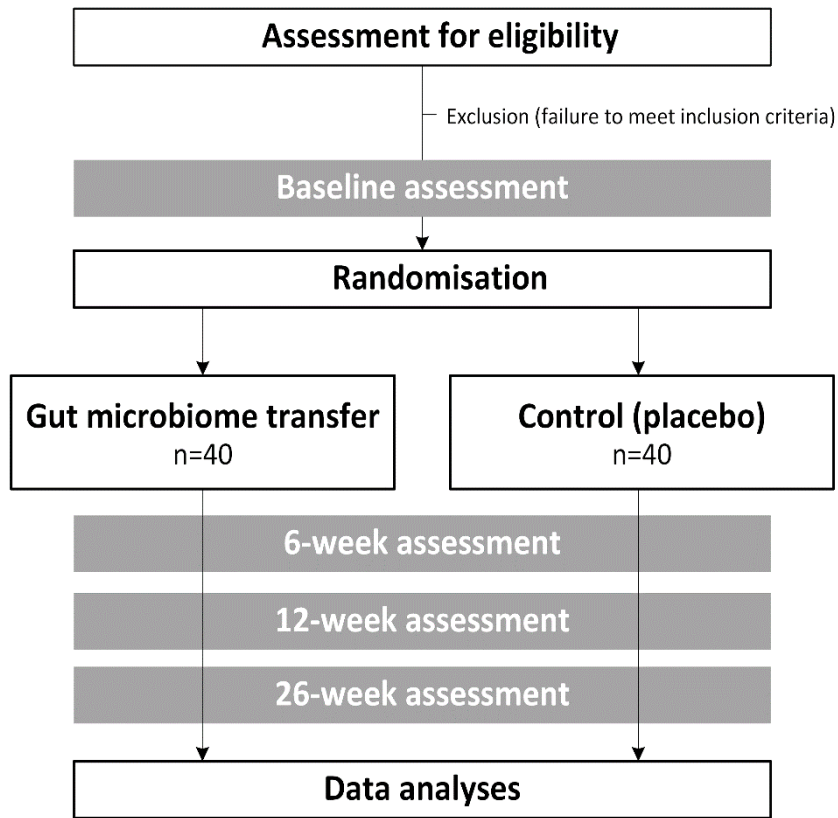

769  
770  
771  
772  
773  
774  
775  
776  
777  
778  
779  
780  
781  
782  
783  
784  
785  
786

787 **Table 1.** Inclusion and exclusion criteria for donors in the Gut Bugs Trial. Exclusion criteria adapted  
788 from Youngster et al., Hirsch et al., van Nood et al., and Bakken et al.<sup>17-19,67</sup>.  
789

---

|                  |                                                                                                                                                                                                                                                                                                                                                                                                                                                                                                                                                                                                                                                                                                                                                                                                                                                                                                                                                                                                                                                                                                                                                                                                                                                                                                                                                                                                            |
|------------------|------------------------------------------------------------------------------------------------------------------------------------------------------------------------------------------------------------------------------------------------------------------------------------------------------------------------------------------------------------------------------------------------------------------------------------------------------------------------------------------------------------------------------------------------------------------------------------------------------------------------------------------------------------------------------------------------------------------------------------------------------------------------------------------------------------------------------------------------------------------------------------------------------------------------------------------------------------------------------------------------------------------------------------------------------------------------------------------------------------------------------------------------------------------------------------------------------------------------------------------------------------------------------------------------------------------------------------------------------------------------------------------------------------|
| <b>Inclusion</b> | <ul style="list-style-type: none"><li>• Age 18 to 28 years</li><li>• BMI &gt;18.5 kg/m<sup>2</sup> and &lt;30.0 kg/m<sup>2</sup></li><li>• Total body fat ≤29% for females and ≤19% for males</li><li>• Regular exercise (moderate to vigorous physical activity for at least 3.5 hours per week)</li><li>• Regular bowel habit (at least once every two days)</li><li>• Intake of ≥4 portions of fruit and/or vegetables per day</li></ul>                                                                                                                                                                                                                                                                                                                                                                                                                                                                                                                                                                                                                                                                                                                                                                                                                                                                                                                                                                |
| <b>Exclusion</b> | <ul style="list-style-type: none"><li>• Any transmissible viral or bacterial pathogens, or intestinal parasites</li><li>• Multidrug-resistant organisms (<i>e.g.</i> vancomycin-resistant enterococci, extended-spectrum beta-lactamase-producing Enterobacteriaceae, and carbapenem-resistant Enterobacteriaceae)</li><li>• Gastrointestinal disease (including symptoms of irritable bowel syndrome, inflammatory bowel disease, or coeliac disease)</li><li>• Atopic diseases requiring regular prophylaxis or treatment</li><li>• Current or past history of malignancy</li><li>• Impaired fasting glucose or impaired glucose tolerance</li><li>• Type 1 diabetes, type 2 diabetes, or monogenic diabetes</li><li>• Known dyslipidaemia, hypertension, or metabolic syndrome</li><li>• Regular use of medications known to influence metabolism or the gut microbiome</li><li>• Use of oral antibiotics in the past three months</li><li>• Regular 'binge drinking', <i>i.e.</i> consumption of 5 or more standard drinks of alcohol per session, at least once a week</li><li>• Any use of recreational drugs or tobacco</li><li>• Current or past pregnancy</li><li>• Overseas travel in previous 6 months, except for visits to Australia, UK, USA, Canada, Northern Europe, France, and Germany.</li><li>• UK residence in 1980–1996 (due to risk of variant Creutzfeldt-Jakob disease)</li></ul> |

---

790

791

792

793 **Table 2.** Inclusion and exclusion criteria for recipients in the Gut Bugs Trial.

794

---

|                  |                                                                                                                                                                                                                                                                                                                                                                                                                                                                                                                                                                                                                                                                                                                                                                                                                                                         |
|------------------|---------------------------------------------------------------------------------------------------------------------------------------------------------------------------------------------------------------------------------------------------------------------------------------------------------------------------------------------------------------------------------------------------------------------------------------------------------------------------------------------------------------------------------------------------------------------------------------------------------------------------------------------------------------------------------------------------------------------------------------------------------------------------------------------------------------------------------------------------------|
| <b>Inclusion</b> | <ul style="list-style-type: none"><li>• Aged 14 to 18 years</li><li>• BMI <math>\geq 30</math> kg/m<sup>2</sup></li><li>• Post-pubertal (Tanner stage 5)</li></ul>                                                                                                                                                                                                                                                                                                                                                                                                                                                                                                                                                                                                                                                                                      |
| <b>Exclusion</b> | <ul style="list-style-type: none"><li>• Gastrointestinal disease (including inflammatory bowel disease or coeliac disease)</li><li>• Use of regular medications that may influence weight, metabolism, or the gut microbiome (including oral oestrogen-containing contraceptives, antidepressants, glucose-lowering drugs, diet drugs, as well as inhaled, topical, or oral steroids)</li><li>• Consumption of probiotics</li><li>• Type 1 diabetes, type 2 diabetes, or monogenic diabetes</li><li>• Chronic diseases that could affect the primary outcome (other than obesity-related conditions)</li><li>• Food allergies</li><li>• Allergy to macrogol (active ingredient in the bowel preparation product)</li><li>• Allergy to any over-the-counter medication</li><li>• No antibiotic usage for three months prior to trial treatment</li></ul> |

---

795

796

797



798 **Table 3.** Timing of individual assessments in the Gut Bugs Trial.

799

|                           |                                                            | Baseline | 6 weeks | 12 weeks | 26 weeks |
|---------------------------|------------------------------------------------------------|----------|---------|----------|----------|
| <b>Clinic</b>             | Medical history and exam                                   | ✓        | ✓       | ✓        | ✓        |
|                           | Anthropometry                                              | ✓        | ✓       | ✓        | ✓        |
|                           | DXA                                                        | ✓        | ✓       | ✓        | ✓        |
|                           | Clinic blood pressure                                      | ✓        | ✓       | ✓        | ✓        |
|                           | 24-h ambulatory blood pressure monitoring                  | ✓        | ✓       | -        | -        |
| <b>Questionnaires</b>     | 3-day dietary record                                       | -        | ✓       | -        | -        |
|                           | NZAFFQ                                                     | ✓        | ✓       | ✓        | ✓        |
|                           | Birmingham IBS                                             | ✓        | ✓       | ✓        | ✓        |
|                           | Bowel movement questionnaire                               | ✓        | ✓       | ✓        | ✓        |
|                           | PedsQL                                                     | ✓        | ✓       | ✓        | ✓        |
|                           | EPOCH                                                      | ✓        | ✓       | ✓        | ✓        |
|                           | IPAQ                                                       | ✓        | ✓       | ✓        | ✓        |
|                           | ASAQ                                                       | ✓        | ✓       | ✓        | ✓        |
| <b>Laboratory</b>         | Matsuda Index                                              | ✓        | ✓       | ✓        | ✓        |
|                           | HOMA-IR                                                    | ✓        | ✓       | ✓        | ✓        |
|                           | HbA1c                                                      | ✓        | ✓       | ✓        | ✓        |
|                           | Fasting lipid profile                                      | ✓        | ✓       | ✓        | ✓        |
|                           | Liver function tests                                       | ✓        | ✓       | ✓        | ✓        |
|                           | hsCRP and uric acid                                        | ✓        | ✓       | ✓        | ✓        |
| <b>Stool bacteriology</b> | Gut microbial composition via 16S rRNA amplicon sequencing | ✓        | ✓       | ✓        | ✓        |
|                           | Metagenome                                                 | ✓        | ✓       | -        | -        |

800

801 ASAQ, Adolescent Sedentary Activity Questionnaire; DXA, Dual-energy x-ray absorptiometry;  
 802 EPOCH, Engagement Perseverance Optimism Connectedness Happiness; HbA1c, glycated  
 803 haemoglobin; HOMA-IR, homeostasis model assessment of insulin resistance; hsCRP, high-sensitivity  
 804 C-Reactive Protein; IBS, irritable bowel syndrome; IPAQ, International Physical Activity  
 805 Questionnaire; NZAFFQ, New Zealand Adolescent food frequency questionnaire; PedsQL, Pediatric  
 806 Quality of Life Inventory.
