# Supplementary material for: Effects of Fecal Microbiome Transfer in Adolescents With Obesity: The Gut Bugs Randomized Controlled Trial
Source: PubMed Central journal article supplement (PMC7753902; doi:10.1001/jamanetworkopen.2020.30415), 2020-12-21
Supplement: jamanetwopen-e2030415-s002.pdf [file jamanetwopen-e2030415-s002.pdf]

1  
2  
3  
4  
5  
6  
7  
8  
9

# Statistical Analysis Plan

|                                  |                      |
|----------------------------------|----------------------|
| <b>Trial Registration number</b> | ACTRN12615001351505p |
| <b>Universal trial number</b>    | U1111-1176-6753      |

## Trial Title : Gut Bugs Trial

**By:** Dr Karen Leong  
**Date:** 10/04/2019  
**Version:** Version 1.0  
**Protocol:** Version 1.0  
**Funding:** Rockfield Trust  
A Better Start – National Science Challenge

### SIGNATURE PAGE

**CLINICIAN**

Dr Karen Leong  
Liggins Institute – University of Auckland  
Auckland – New Zealand  
k.leong@auckland.ac.nz

  
\_\_\_\_\_  
Signature

Date: 10/4/2019

**TRIAL STATISTICIAN**

Dr José Demalk  
Liggins Institute – University of Auckland  
Auckland – New Zealand  
j.demalk@auckland.ac.nz

  
\_\_\_\_\_  
Signature

Date: 10/4/2019

**SENIOR BIostatistician**

Dr Yannan Jiang  
Department of Statistics  
Liggins Institute – University of Auckland  
Auckland – New Zealand  
y.jiang@auckland.ac.nz

  
\_\_\_\_\_  
Signature

Date: 10/4/2019

**PRINCIPAL INVESTIGATOR**

Prof Wayne Cutfield  
Liggins Institute – University of Auckland  
Auckland – New Zealand  
w.cutfield@auckland.ac.nz

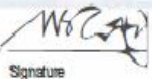  
\_\_\_\_\_  
Signature

Date: 10/4/2019

**PRINCIPAL INVESTIGATOR**

Asso: Prof Justin O'Sullivan  
Liggins Institute – University of Auckland  
Auckland – New Zealand  
justin.osullivan@auckland.ac.nz

  
\_\_\_\_\_  
Signature

Date: 10/4/19

**CO-INVESTIGATOR - MICROBIOME**

Dr Tommi Vatanen  
Liggins Institute – University of Auckland  
Auckland – New Zealand  
tvatanen@auckland.ac.nz

  
\_\_\_\_\_  
Signature

Date: 10/4/2019

## 12 TABLE OF CONTENTS

|    |          |                                                               |           |
|----|----------|---------------------------------------------------------------|-----------|
| 13 | <b>1</b> | <b>INTRODUCTION .....</b>                                     | <b>5</b>  |
| 14 | 1.1      | Background.....                                               | 5         |
| 15 | 1.2      | Objectives .....                                              | 5         |
| 16 | <b>2</b> | <b>STUDY METHODS.....</b>                                     | <b>5</b>  |
| 17 | 2.1      | Trial design .....                                            | 5         |
| 18 | 2.2      | Recruitment and eligibility criteria .....                    | 5         |
| 19 |          | 2.2.1 Donors .....                                            | 5         |
| 20 |          | 2.2.2 Participants (recipients).....                          | 7         |
| 21 | 2.3      | Randomisation, allocation, and blinding .....                 | 8         |
| 22 | 2.4      | Study intervention .....                                      | 8         |
| 23 | 2.5      | Outcome measures.....                                         | 9         |
| 24 | 2.6      | Sample size and power calculation.....                        | 9         |
| 25 | <b>3</b> | <b>DATA COLLECTION AND MANAGEMENT.....</b>                    | <b>10</b> |
| 26 | 3.1      | Flow of participants .....                                    | 10        |
| 27 | 3.2      | Scheduled assessments .....                                   | 11        |
| 28 | 3.3      | Withdrawals .....                                             | 11        |
| 29 | 3.4      | Research forms and data collection tools .....                | 12        |
| 30 | 3.5      | Safety monitoring and evaluation.....                         | 14        |
| 31 | 3.6      | Outcome variables and definitions.....                        | 14        |
| 32 |          | 3.6.1 Body mass index standard deviation score (BMI SDS)..... | 14        |
| 33 |          | 3.6.2 Total body fat percentage (from DXA).....               | 15        |
| 34 |          | 3.6.3 Insulin sensitivity.....                                | 15        |
| 35 |          | 3.6.4 Liver function .....                                    | 15        |
| 36 |          | 3.6.5 Lipid profile .....                                     | 15        |
| 37 |          | 3.6.6 Inflammatory markers.....                               | 16        |
| 38 |          | 3.6.7 Blood pressure .....                                    | 16        |
| 39 |          | 3.6.8 Definitions of abnormal outcomes .....                  | 17        |
| 40 |          | 3.6.9 EPOCH Measure of Adolescent Well-Being.....             | 19        |
| 41 |          | 3.6.10 Pediatric Quality of Life Inventory (PedsQL).....      | 19        |
| 42 |          | 3.6.11 IBS symptoms.....                                      | 19        |
| 43 |          | 3.6.12 Bowel movements.....                                   | 19        |
| 44 |          | 3.6.13 Gut microbial composition.....                         | 20        |
| 45 | 3.7      | Diet, physical activity, and socioeconomic status .....       | 21        |
| 46 |          | 3.7.1 IPAQ .....                                              | 21        |
| 47 |          | 3.7.2 ASAQ .....                                              | 23        |
| 48 |          | 3.7.3 NZAFFQ .....                                            | 23        |
| 49 |          | 3.7.4 3-day food diary.....                                   | 23        |
| 50 |          | 3.7.5 Socioeconomic status.....                               | 23        |
| 51 | <b>4</b> | <b>STATISTICAL METHODS.....</b>                               | <b>23</b> |
| 52 | 4.1      | Primary outcome analyses.....                                 | 24        |

|    |          |                                             |           |
|----|----------|---------------------------------------------|-----------|
| 53 | 4.2      | Secondary outcome analyses.....             | 25        |
| 54 | <b>5</b> | <b>MICROBIOME DATA ANALYSIS.....</b>        | <b>25</b> |
| 55 | 5.1      | Initial bioinformatics .....                | 25        |
| 56 | 5.2      | Metagenomic assembly .....                  | 26        |
| 57 | 5.3      | Statistical comparisons .....               | 26        |
| 58 | 5.4      | Engraftment analysis .....                  | 28        |
| 59 | 5.5      | Identification of super-donor behavior..... | 28        |
| 60 | <b>6</b> | <b>REPORTING OF TRIAL RESULTS .....</b>     | <b>29</b> |
| 61 | 6.1      | Baseline characteristics .....              | 29        |
| 62 | 6.2      | Study outcomes .....                        | 29        |
| 63 | <b>7</b> | <b>REFERENCES .....</b>                     | <b>36</b> |
| 64 |          |                                             |           |
| 65 |          |                                             |           |
| 66 |          |                                             |           |

67 **1 INTRODUCTION**

68 **1.1 Background**

69

70 This document contains the statistical analysis plan for the Gut Bugs Trial. In brief, this is a  
71 randomised double-blind placebo-controlled trial of gut microbiome transfer for the treatment of  
72 obesity in adolescents. This document is prepared following the CONSORT guidelines <sup>1,2</sup>

73

74 **1.2 Objectives**

75

76 This trial aims to assess the effectiveness of gut microbiome transfer using encapsulated  
77 material for the treatment of obesity in adolescents. We aim to assess the effect of gut  
78 microbiome transfer on weight, total body fat, insulin sensitivity, metabolic changes, bowel  
79 movements and quality of life in these adolescents.

80

81

82 **2 STUDY METHODS**

83

84 **2.1 Trial design**

85

86 A two-arm, double-blind, placebo-controlled, randomised clinical trial with obese adolescents  
87 randomly assigned to either treatment (encapsulated gut microbiome) or placebo (encapsulated  
88 saline solution), stratified by sex. Eligible participants will be followed for 26 weeks post  
89 randomisation (Figure 1). This trial protocol is reported as per the SPIRIT guidelines <sup>3</sup>.

90

91 **2.2 Recruitment and eligibility criteria**

92

93 **2.2.1 Donors**

94

95 We will recruit 8 donors (4 males and 4 females), as recipients will only receive gut microbiome  
96 from donors of the same sex. This is to enhance microbial variability and standardise the  
97 treatment via gut microbiome transfer. Donors will be selected based on strict inclusion criteria  
98 (Table 1).

99

100

101 **Table 1.** Inclusion and exclusion criteria for donors in the Gut Bugs Trial.

---

|                  |                                                                                                                                                                                                                                                                                                                                                                                                                                                                                                                                                                                                                                                                                                                                                                                                                                                                                                                                                                                                                                                                                                                                                                                                                                                                                                                                                                                                              |
|------------------|--------------------------------------------------------------------------------------------------------------------------------------------------------------------------------------------------------------------------------------------------------------------------------------------------------------------------------------------------------------------------------------------------------------------------------------------------------------------------------------------------------------------------------------------------------------------------------------------------------------------------------------------------------------------------------------------------------------------------------------------------------------------------------------------------------------------------------------------------------------------------------------------------------------------------------------------------------------------------------------------------------------------------------------------------------------------------------------------------------------------------------------------------------------------------------------------------------------------------------------------------------------------------------------------------------------------------------------------------------------------------------------------------------------|
| <b>Inclusion</b> | <ul style="list-style-type: none"> <li>• Age 18 to 28 years</li> <li>• BMI &gt;18.5 kg/m<sup>2</sup> and &lt;30.0 kg/m<sup>2</sup></li> <li>• Total body fat ≤29% for females and ≤19% for males</li> <li>• Regular exercise (moderate to vigorous physical activity for at least 3.5 hours per week)</li> <li>• Regular bowel habit (at least once every two days)</li> <li>• Intake of ≥4 portions of fruit and/or vegetables per day</li> </ul>                                                                                                                                                                                                                                                                                                                                                                                                                                                                                                                                                                                                                                                                                                                                                                                                                                                                                                                                                           |
| <b>Exclusion</b> | <ul style="list-style-type: none"> <li>• Any transmissible viral or bacterial pathogens, or intestinal parasites</li> <li>• Multidrug-resistant organisms (e.g. vancomycin-resistant enterococci, extended-spectrum beta-lactamase-producing Enterobacteriaceae, and carbapenem-resistant Enterobacteriaceae)</li> <li>• Gastrointestinal disease (including symptoms of irritable bowel syndrome, inflammatory bowel disease, or coeliac disease)</li> <li>• Atopic diseases requiring regular prophylaxis or treatment</li> <li>• Current or past history of malignancy</li> <li>• Impaired fasting glucose or impaired glucose tolerance</li> <li>• Type 1 diabetes, type 2 diabetes, or monogenic diabetes</li> <li>• Known dyslipidaemia, hypertension, or metabolic syndrome</li> <li>• Regular use of medications known to influence metabolism or the gut microbiome</li> <li>• Use of oral antibiotics in the past three months</li> <li>• Regular 'binge drinking', i.e. consumption of 5 or more standard drinks of alcohol per session, at least once a week</li> <li>• Any use of recreational drugs or tobacco</li> <li>• Current or past pregnancy</li> <li>• Overseas travel in previous 6 months, except for visits to Australia, UK, USA, Canada, Northern Europe, France, and Germany.</li> <li>• UK residence in 1980–1996 (due to risk of variant Creutzfeldt-Jakob disease)</li> </ul> |

---

102

103 Eligible donors will be identified by word of mouth, the internal email system at the University of  
 104 Auckland, and social media networks. Potential donors will be given a detailed information sheet  
 105 about the study that includes a consent form.

106

107 To eliminate the risks of transmission of infectious diseases we will use screening procedures  
 108 equivalent to those used for blood donation in New Zealand<sup>4</sup>, and also screen donors for  
 109 potential faecal pathogens or multidrug-resistant organisms. As part of this regimen, all potential  
 110 donors will undergo extensive testing for human pathogens, antigens, and antibodies (that  
 111 indicate exposure to hepatitis A, B, or C viruses, and human immunodeficiency virus), syphilis,  
 112 *C. difficile*, *Helicobacter pylori*, other bacterial and viral pathogens, multidrug-resistant  
 113 organisms, as well as intestinal parasites. We will supplement these microbiological tests with  
 114 characterisation of the gut microbiome through analysis of the metagenome and  
 115 metatranscriptome<sup>5</sup>. In addition, we will conduct an interview to gather information about  
 116 behaviours or activities that may exclude them from the trial.

117

118 Given evidence that irritable bowel syndrome (IBS) may be related to the gut microbiome, it is  
119 important to exclude potential donors who may have IBS. The Rome criteria are an accepted  
120 clinical tool to identify individuals with IBS, but they are relatively insensitive so that strict  
121 adherence to those criteria would potentially allow for individuals with mild IBS to donate <sup>6</sup>.  
122 Therefore, we will screen for IBS using a conservative modification of the Rome criteria, where  
123 we define a positive screen as having 3 or more episodes of abdominal pain per month as  
124 described in part I of the criteria, as well as an additional symptom as defined in part II<sup>7</sup>.

125

126 Each donor is expected to produce a wet stool sample weighing 100-150 g. Our preliminary  
127 laboratory data indicate that an average stool sample from a donor will generate sufficient gut  
128 microbiome material for two same-sex recipients. Stool samples will be collected and  
129 immediately processed for encapsulation. Capsules from each sample will be individually coded,  
130 so that each recipient will receive an equal number of capsules (n=7) from each of the four same  
131 sex donors.

### 132 **2.2.2 Participants (recipients)**

133

134 We aim to recruit 80 obese adolescents according to the inclusion and exclusion criteria  
135 described in Table 2.

136

137 **Table 2.** Inclusion and exclusion criteria for recipients in the Gut Bugs Trial.

---

|                  |                                                                                                                                                                                                                                                                                                                                                                                                                                                                                                                                                                                                                                                                                                                                                                                                                                                         |
|------------------|---------------------------------------------------------------------------------------------------------------------------------------------------------------------------------------------------------------------------------------------------------------------------------------------------------------------------------------------------------------------------------------------------------------------------------------------------------------------------------------------------------------------------------------------------------------------------------------------------------------------------------------------------------------------------------------------------------------------------------------------------------------------------------------------------------------------------------------------------------|
| <b>Inclusion</b> | <ul style="list-style-type: none"><li>• Aged 14 to 18 years</li><li>• BMI <math>\geq 30</math> kg/m<sup>2</sup></li><li>• Post-pubertal (Tanner stage 5)</li></ul>                                                                                                                                                                                                                                                                                                                                                                                                                                                                                                                                                                                                                                                                                      |
| <b>Exclusion</b> | <ul style="list-style-type: none"><li>• Gastrointestinal disease (including inflammatory bowel disease or coeliac disease)</li><li>• Use of regular medications that may influence weight, metabolism, or the gut microbiome (including oral oestrogen-containing contraceptives, antidepressants, glucose-lowering drugs, diet drugs, as well as inhaled, topical, or oral steroids)</li><li>• Consumption of probiotics</li><li>• Type 1 diabetes, type 2 diabetes, or monogenic diabetes</li><li>• Chronic diseases that could affect the primary outcome (other than obesity-related conditions)</li><li>• Food allergies</li><li>• Allergy to macrogol (active ingredient in the bowel preparation product)</li><li>• Allergy to any over-the-counter medication</li><li>• No antibiotic usage for three months prior to trial treatment</li></ul> |

---

138

139 Eligible recipients will be recruited via social media, word of mouth, and paediatric endocrinology  
140 clinics in Auckland. Potential recipients and caregivers will be given a detailed information sheet  
141 about the study that includes a consent form. Consent will be obtained from recipients if they are  
142 aged  $\geq 16$  years and from their parents if aged  $< 16$  years. Younger recipients will also be asked  
143 to sign an assent form. All consent and/or assent will be obtained by the researchers prior to the  
144 recipient's participation in the trial. All potential and enrolled recipients' personal information are

145 recorded and kept in a secure folder and only accessible to the researchers, in order to protect  
146 their confidentiality.

147

### 148 **2.3 Randomisation, allocation, and blinding**

149

150 Eligible participants will be randomised in a 1:1 ratio to either treatment or placebo group,  
151 stratified by sex, using block randomisation with variable block sizes of 2 and 4<sup>8</sup>. Randomisation  
152 sequences will be computer generated, and overseen by the biostatistician. Researchers and  
153 participants will be blinded to capsule contents, both of which (placebo and gut microbiome) look  
154 identical (white).

155

156 There are three steps in the blinding and allocation process. First, the independent research  
157 nurse allocates the recipient to group A or B using the randomisation sequence. Second, the  
158 placebo and treatment capsule packs each have a unique code (assigned by the technician who  
159 encapsulated them). Lastly, the independent research nurse allocates the pack according to the  
160 unique code associated with the randomisation sequence.

161

162 To maintain the integrity of the trial evaluation, statistical analyses will be performed at the  
163 completion of the study after all trial data have been collected. The biostatistician will be blinded  
164 to treatment allocation throughout the trial, as well as study investigators. Recipients will be  
165 asked if they are able to identify the contents of capsules taken (*i.e.* placebo or gut microbiome)  
166 at 6 weeks and 26 weeks. The effectiveness of treatment blinding will be assessed using the  
167 Bang's blinding index<sup>9</sup>. Blinding success will be determined by the thresholds of Moroz et al.<sup>10</sup>:  
168 unblinded (BBI  $\geq 0.2$ ); random guesses ( $-0.2 < \text{BBI} < 0.2$ ); or opposite guesses (BBI  $\leq -0.2$ ).

169

170 Recipients will be unblinded in the case of any serious adverse events. These include on-going  
171 gastrointestinal bleeding, severe vomiting and/or diarrhoea, treatment related systemic infection,  
172 and treatment related severe allergic reaction, coma, collapse and death. Unblinding will be  
173 done by an independent researcher who did not have any prior contact with the recipient, who  
174 will be able to determine the individual's treatment allocation.

175

### 176 **2.4 Study intervention**

177

178 All recipients will undergo bowel cleansing prior to treatment using an oral solution containing 70  
179 g of Glycoprep-C® (active ingredient macrogol 3350) (Fresenius Kabi Australia Pty Ltd., Mount  
180 Kuring-gai, Australia). Recipients will be advised to take the Glycoprep-C® solution between 4  
181 pm and 6 pm the day before the treatment begins. It is expected that watery stools will follow for  
182 several hours to achieve bowel cleansing. Recipients will attend clinic early next morning, when



183 each recipient in the placebo group will ingest saline capsules, while those in the treatment  
184 group will receive gut microbiome capsules. Each recipient will receive a total of 28 capsules  
185 (approximately 14 ml of frozen microbial suspension or saline) administered over two  
186 consecutive mornings under direct supervision from research staff, specifically 16 capsules in  
187 the first morning and 12 capsules in the second morning. Recipients will be advised not to  
188 change their diet, physical activity, and behaviour during the trial.

189

## 190 **2.5 Outcome measures**

191

192 **Primary outcome:** BMI SDS at 6 weeks

193

### 194 **Secondary outcomes**

195 • BMI SDS at 12, and 26 weeks

196 • total body fat percentage (from DXA) at 6, 12, and 26 weeks

197 • insulin sensitivity at 6, 12, and 26 weeks

198 • gut microbial composition at 6, 12, and 26 weeks

199 • liver function at 6, 12, and 26 weeks

200 • lipid profile at 6, 12, and 26 weeks

201 • inflammatory markers [uric acid, high-sensitivity C-reactive protein (hsCRP)] at 6, 12, and 26  
202 weeks

203 • blood pressure at 6, 12, and 26 weeks

204 • health-related quality of life at 6, 12, and 26 weeks

205 • IBS symptoms at 6, 12, and 26 weeks

206 • bowel movements at 6, 12, and 26 weeks

207

208 All outcomes will be analysed at the end of trial, after all the participants completed their 26  
209 weeks follow up visits.

## 210 **2.6 Sample size and power calculation**

211

212 Power calculation was based on data from a cohort of 50 obese adolescents in Australia aged  
213 14–18 years, with a pooled mean BMI SDS of 2.5 and standard deviation of 0.27 at baseline <sup>11</sup>.

214 A study with 32 recipients per group will have 80% power at 5% significance level (two-sided) to  
215 detect a group difference of 0.19 in BMI SDS at 6 weeks after gut microbiome transfer. To  
216 account for an approximate 20% loss to follow-up, we aim to recruit 40 treatment and 40 control  
217 recipients.

218

219 **3 DATA COLLECTION AND MANAGEMENT**

220 **3.1 Flow of participants**

221 **Figure 1.** Diagram showing flow of participants (recipients) in the Gut Bugs Trial <sup>2</sup>.

222

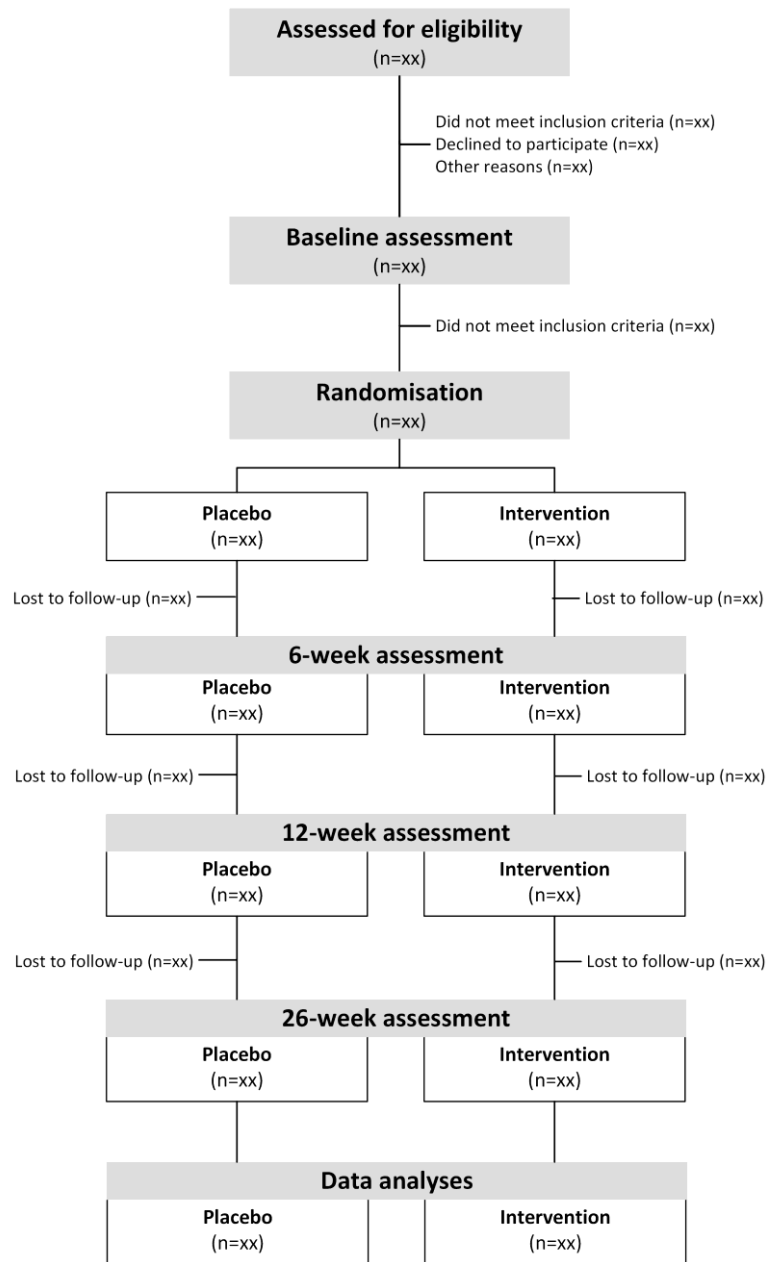

223

224

225

226

227 **3.2 Scheduled assessments**

228

229 The timing of scheduled assessments is shown in Table 3.

230

231 **Table 3.** Timing of individual assessments in the Gut Bugs Trial.

|                           |                                                            | Baseline | 6 weeks | 12 weeks | 26 weeks |
|---------------------------|------------------------------------------------------------|----------|---------|----------|----------|
| <b>Clinic</b>             | Medical history and exam                                   | ✓        | ✓       | ✓        | ✓        |
|                           | Anthropometry                                              | ✓        | ✓       | ✓        | ✓        |
|                           | DXA                                                        | ✓        | ✓       | ✓        | ✓        |
|                           | Clinic blood pressure                                      | ✓        | ✓       | ✓        | ✓        |
|                           | 24-h ambulatory blood pressure monitoring                  | ✓        | ✓       | -        | -        |
| <b>Questionnaires</b>     | 3-day dietary record                                       | -        | ✓       | -        | -        |
|                           | NZAFFQ                                                     | ✓        | ✓       | ✓        | ✓        |
|                           | Birmingham IBS                                             | ✓        | ✓       | ✓        | ✓        |
|                           | Bowel movement questionnaire                               | ✓        | ✓       | ✓        | ✓        |
|                           | PedsQL                                                     | ✓        | ✓       | ✓        | ✓        |
|                           | EPOCH                                                      | ✓        | ✓       | ✓        | ✓        |
|                           | IPAQ                                                       | ✓        | ✓       | ✓        | ✓        |
|                           | ASAQ                                                       | ✓        | ✓       | ✓        | ✓        |
| <b>Laboratory</b>         | Matsuda Index                                              | ✓        | ✓       | ✓        | ✓        |
|                           | HOMA-IR                                                    | ✓        | ✓       | ✓        | ✓        |
|                           | HbA1c                                                      | ✓        | ✓       | ✓        | ✓        |
|                           | Fasting lipid profile                                      | ✓        | ✓       | ✓        | ✓        |
|                           | Liver function tests                                       | ✓        | ✓       | ✓        | ✓        |
|                           | hsCRP and uric acid                                        | ✓        | ✓       | ✓        | ✓        |
| <b>Stool bacteriology</b> | Gut microbial composition via 16S rRNA amplicon sequencing | ✓        | ✓       | ✓        | ✓        |
|                           | Metagenome                                                 | ✓        | ✓       | -        | -        |

232 ASAQ, Adolescent Sedentary Activity Questionnaire; DXA, Dual-energy x-ray absorptiometry; EPOCH, Engagement Perseverance Optimism  
 233 Connectedness Happiness; HbA1c, glycated haemoglobin; HOMA-IR, homeostasis model assessment of insulin resistance; hsCRP, high-  
 234 sensitivity C-Reactive Protein; IBS, irritable bowel syndrome; IPAQ, International Physical Activity Questionnaire; NZAFFQ, New Zealand  
 235 Adolescent food frequency questionnaire; PedsQL, Pediatric Quality of Life Inventory.

236

237 **3.3 Withdrawals**

238

239 Any participant who withdraws from the trial will be contacted by the clinical team. Attempts will  
 240 be made to offer the participants the chance to provide crucial clinical information via follow up  
 241 text messages or emails. All reasons for withdrawal will be recorded in secure databases, and  
 242 will also be presented to the safety monitoring committee.

243

244

245

246 **3.4 Research forms and data collection tools**

247

248 All clinical assessments will be performed in accordance with Standard Operating Procedures  
249 and documented in relevant worksheets (i.e. case report forms – CRF) (Table 4).

250

251 **Table 4.** List of available case report forms (CRF) to be used in the Gut Bugs Trial.

|                                                                 |                                                                                                                                                                                                |
|-----------------------------------------------------------------|------------------------------------------------------------------------------------------------------------------------------------------------------------------------------------------------|
| <b>Demography</b>                                               | Participant's questionnaire<br>Caregiver's questionnaire                                                                                                                                       |
| <b>Clinical history &amp; physical examination <sup>1</sup></b> | Recipient Worksheet – Baseline<br>Recipient Worksheet – Week 6<br>Recipient Worksheet – Week 12<br>Recipient Worksheet – Week 26                                                               |
| <b>24-hour ambulatory BP monitoring</b>                         | 24hr ABP worksheet<br>Blood pressure report generated from Spacelabs Healthcare<br>Sleep-activity diary                                                                                        |
| <b>DXA</b>                                                      | Report generated from Lunar Prodigy<br>Report generated from Lunar iDXA                                                                                                                        |
| <b>Health-related quality of life</b>                           | EPOCH measure of adolescent well-being<br>Paediatric Quality of Life Inventory (PedsQL)<br>Birmingham symptom questionnaire<br>Bowel movement questionnaire                                    |
| <b>Diet and physical activity</b>                               | International physical activity questionnaire (IPAQ)<br>Adolescent sedentary activity questionnaire (ASAQ)<br>New Zealand Adolescent food frequency questionnaire (NZAFFQ)<br>3-day food diary |

252 <sup>1</sup> Includes records adverse events (if any) and blinding questions.

253

254 These are checked for completeness of data by the clinical research team. All questionnaires  
255 are checked for completeness. All paper CRFs, reports, questionnaires will be scanned and  
256 saved to the Gut Bugs Trial shared drive in appropriately named folders.

257

258 All questionnaires (except dietary ones) will be scored using specifically designed Microsoft  
259 Excel Spreadsheets for each questionnaire. Data will be entered once by the data entry person  
260 and validated by another data entry person. A final check will be carried out by the clinical  
261 research fellow.

262

263 All clinical data are to be entered into REDCap in accordance with the Data Management  
264 Standard Operating Procedure. Data will be entered once by the data entry person, validated by  
265 another data entry person, and finally checked and locked by the clinical research fellow. Below  
266 are the step-by-step process for data checking, which will be reflected by the REDCap Status  
267 stated below:

268

269 **Incomplete** Data entry is in progress and has been entered by first data entry person. Any  
270 missing information should be highlighted and efforts to obtain that information  
271 will be done by the clinical research team.

272

273 **Unverified** Data entry has been checked by second data entry person who will change the  
274 status from Incomplete to Unverified.

275

276 **Complete** All available data has been entered and verified.  
277 Data is ready for cleaning and monitoring.  
278 The data monitoring team will change status to Complete.

279

280 All complete data will be regularly checked by the trial statistician to identify potential data entry  
281 errors based on clinical plausibility. Dubious data points will be followed up and the respective  
282 clinical records checked.

283

284 Data that are to be imported into REDCap include:

- 285 1. NZIMD values
- 286 2. Paper questionnaires scores
- 287 3. BMI SDS values
- 288 4. Blood lipids
- 289 5. Liver function tests
- 290 6. Glucose, insulin, insulin sensitivity index values
- 291 7. Inflammatory markers

292

293 All data to be imported will be checked and cleaned by the trial statistician prior to importing into  
294 REDCap. Each variable entered into REDCap will be given a unique name and the completed  
295 codebook will be attached as an appendix to this document. Further details of data management  
296 are included in the Appendix 1 under Data Management Standard Operating Procedure.

297

298

299 **3.5 Safety monitoring and evaluation**

300

301 An independent safety monitoring committee has been established to for the duration of the trial.  
 302 Participants' data will be monitored by the research team and the safety committee throughout  
 303 the study for any adverse events, in particular gastrointestinal symptoms and possible allergies.  
 304 Any possible adverse events are asked and recorded at 24 hours, 48 hours, 1 week, 3 weeks, 6  
 305 weeks, 12 weeks, and 26 weeks after the intervention in the adverse events worksheets. All  
 306 potential adverse events will be recorded in a secure database. Any serious adverse event that  
 307 is identified will be flagged and highlighted as soon as possible to the committee. If any  
 308 participant suffers harm as a result of trial participation, they will be eligible to apply for  
 309 compensation from the Accident Compensation Cooperation (ACC), which is a compulsory  
 310 insurance cover for personal injury for everyone in New Zealand

311

312 **3.6 Outcome variables and definitions**

313

314 The study's outcome variables are listed in Table 5.

315

316 **Table 5.** List of key outcome variables in the Gut Bugs Trial.

---

|                                |                                                                                             |
|--------------------------------|---------------------------------------------------------------------------------------------|
| Anthropometry                  | BMI SDS                                                                                     |
| Body composition (DXA)         | Total body fat percentage, A/G ratio                                                        |
| Glucose metabolism             | Matsuda index, HOMA-IR                                                                      |
| Liver function                 | ALP, ALT, AST, GGT                                                                          |
| Lipid profile                  | Total cholesterol, HDL, LDL, TG, total cholesterol/HDL, TG/HDL                              |
| Inflammatory markers           | hsCRP, uric acid                                                                            |
| Blood pressure                 | SBP, DPB, MAP, systolic dip, diastolic dip                                                  |
| Health-related quality of life | EPOCH scores, Peds QL scores, IBS symptoms scores, Bowel movements scores                   |
| Gut microbial composition      | Alpha- and beta-diversities, relative abundance of bacterial taxa, donor strain engraftment |

---

317

318

319 **3.6.1 Body mass index standard deviation score (BMI SDS)**

320

321 There will be triplicate measurements of weight and height. Median weight and height will be  
 322 obtained and used to calculate BMI. The formula is  $BMI = \text{kg}/\text{m}^2$  where kg is a person's weight in  
 323 kilograms and  $\text{m}^2$  is their height in metres squared. Subsequently, BMI SDS will be obtained as  
 324 per World Health Organization standards <sup>12</sup>.

325

326 **3.6.2 Total body fat percentage (from DXA)**

327

328 Total body fat percentage and A/G ratios will be obtained from DXA scan reports performed on  
329 the participants at these time points. The android region is defined as the area between the ribs  
330 and the pelvis that is totally enclosed by the trunk region. The gynoid region includes the hips  
331 and upper thighs and overlaps both the leg and trunk regions<sup>13</sup>. A/G ratio is calculated with the  
332 formula android fat mass/ gynoid fat mass<sup>13</sup>. As we will be utilising 2 different types of DXA  
333 machines (DXA, Lunar Prodigy™ and Lunar iDXA™, GE Medical Systems, Chicago, Illinois,  
334 USA), all participants will have scans done at every time point on the same device.

335

336 **3.6.3 Insulin sensitivity**

337

338 Insulin sensitivity will be assessed in all recipients using the Matsuda index from a 75-g oral  
339 glucose tolerance test (OGTT)<sup>14</sup>. Blood samples will be collected at -10, 0, 30, 60, 90, and 120  
340 minutes for glucose (mmol/L) and insulin (uU/ml) measurements. The insulin and glucose values  
341 will be used to obtain the Matsuda index<sup>15</sup>. The formula is  $1000/\sqrt{[\text{fasting glucose} \times$   
342  $\text{fasting insulin}] \times [\text{mean glucose} \times \text{mean insulin during OGTT}]}$ <sup>15</sup>. Other markers of glycaemic  
343 control will also be measured, namely homeostasis model assessment of insulin resistance  
344 (HOMA-IR)<sup>16</sup> and glycated haemoglobin (HbA1c) (mmol/mol). The formula for HOMA-IR is  
345  $\text{fasting insulin (uU/ml)} \times \text{fasting glucose (mmol/L)}/22.5$ . The normal reference ranges for glucose  
346 and insulin are provided in Table 6.

347

348 **3.6.4 Liver function**

349

350 Liver function will be assessed by measurement of gamma-glutamyl transferase (GGT) (U/L),  
351 alkaline phosphatase (ALP) (U/L), alanine aminotransferase (ALT) (U/L), and aspartate  
352 transaminase (AST) (U/L). The normal reference ranges for GGT, ALP, ALT and AST are  
353 provided in Table 6.

354

355 **3.6.5 Lipid profile**

356

357 Lipid profiles for the recipients will be assessed via measurement of fasting total cholesterol  
358 (mmol/L), high-density lipoprotein cholesterol [HDL] (mmol/L), low-density lipoprotein cholesterol  
359 [LDL] (mmol/L), and triglycerides (mmol/L). The normal reference ranges for total cholesterol,  
360 HDL, LDL, and triglycerides are provided in Table 6.

361

362 **3.6.6 Inflammatory markers**

363

364 Markers of inflammation will be assessed via uric acid (umol/L) and high-sensitivity C-reactive  
365 protein (hsCRP) (mg/L). The normal reference ranges for uric acid and hsCRP are provided in  
366 Table 6.

367

368 **3.6.7 Blood pressure**

369

370 Clinic resting systolic and diastolic blood pressures will be measured at all assessments using  
371 the same oscillometric digital blood pressure monitor (ri-champion<sup>®</sup> N; Riester, Jungingen,  
372 Germany) with an appropriately-sized cuff on the extended non-dominant arm. All  
373 measurements will be recorded on each recipient while seated and after a 5-minute rest. Blood  
374 pressure will be measured three times, and the median value calculated. The normal blood  
375 pressure readings will be following the European Society of Hypertension guidelines for the  
376 management of high blood pressure in children and adolescents <sup>17</sup>.

377

378 In addition, 24-hour ambulatory blood pressure monitoring will be performed at baseline and at 6  
379 weeks, using an oscillometric device (Spacelabs OnTrak; Spacelabs Medical Inc, Redmond,  
380 Washington, USA) on the non-dominant arm. Over a 24-hour period, blood pressure will be  
381 measured every 20 minutes when the recipients are expected to be awake, and every 30  
382 minutes when they are likely to be asleep (based on self-reported information). Recipients will be  
383 asked to record the time they go to bed and the time they wake up over the period of monitoring,  
384 so that waking and sleeping times can be more accurately identified. The average overall blood  
385 pressure, awake blood pressure and the sleep blood pressure readings will be obtained. An  
386 adequate blood pressure report needs at least 14 day readings and 7 night readings <sup>18</sup>. The  
387 normal blood pressure readings will be following the European Society of Hypertension  
388 guidelines for the management of high blood pressure in children and adolescents <sup>17</sup>.

389

390



391 **3.6.8 Definitions of abnormal outcomes**

392 **Table 6 – Definitions of abnormal outcomes**

| OUTCOME                           | PARAMETER                | THRESHOLDS FOR ABNORMAL RESULTS                                                                                                                                                                                 | REFERENCE                                                              |
|-----------------------------------|--------------------------|-----------------------------------------------------------------------------------------------------------------------------------------------------------------------------------------------------------------|------------------------------------------------------------------------|
| <b>Waist circumference</b>        |                          | 14 years: $\geq 90^{\text{th}}$ percentile ( $\geq 79.9$ cm for males; $\geq 77$ cm for females)                                                                                                                | Zimmet et al. 2007 <sup>19</sup> ; Eisenmann et al. 2005 <sup>20</sup> |
|                                   |                          | 15 years: $\geq 90^{\text{th}}$ percentile ( $\geq 81.7$ cm for males; $\geq 78.4$ cm for females)                                                                                                              |                                                                        |
|                                   |                          | $\geq 16$ years: $\geq 94$ cm for males and $\geq 80$ cm for females                                                                                                                                            |                                                                        |
| <b>Glucose homeostasis</b>        | Elevated fasting glucose | $\geq 5.6$ but $< 7.0$ mmol/L (impaired fasting glycaemia); $\geq 7.0$ mmol/L (diabetes)                                                                                                                        | American Diabetes Association 2018 <sup>21</sup>                       |
|                                   | Elevated 1-hour glucose  | $\geq 8.6$ mmol/mol                                                                                                                                                                                             | Fiorentino et al. 2018 <sup>22</sup>                                   |
|                                   | Elevated 2-hour glucose  | $\geq 7.8$ but $< 11.1$ mmol/L (impaired glucose tolerance); $\geq 11.1$ mmol/mol (diabetes)                                                                                                                    | American Diabetes Association 2018 <sup>21</sup>                       |
|                                   | Elevated HbA1c           | $\geq 39$ to $47.9$ mmol/mol (prediabetes); $\geq 48$ mmol/mol (diabetes)                                                                                                                                       | American Diabetes Association 2018 <sup>21</sup>                       |
|                                   |                          | $\geq 5.7$ to $6.49$ % (prediabetes); $\geq 6.5$ % (diabetes)                                                                                                                                                   |                                                                        |
|                                   | Elevated fasting insulin | $< 15$ years: $> 11.4$ uU/ml for males and $> 14.0$ uU/ml for females<br>$\geq 15$ years: $> 11.4$ uU/ml for males and $> 12.9$ uU/ml for females                                                               | Frithioff-Bøjsøe et al. 2019 <sup>23</sup>                             |
| <b>Blood pressure</b>             | Non-dipping status       | Nocturnal drop in SBP and/or DBP $\leq 10\%$                                                                                                                                                                    | Lurbe et al. 2016 <sup>17</sup>                                        |
| <b>Pre-hypertension</b>           | 24-hour ambulatory BP    | SBP and/or DBP $\geq 90^{\text{th}}$ but $< 95^{\text{th}}$ percentile for age and sex                                                                                                                          |                                                                        |
|                                   | Clinic BP                | $< 16$ years: SBP and/or DBP $\geq 90^{\text{th}}$ but $< 95^{\text{th}}$ percentile for age and sex<br>$\geq 16$ years (high normal): SBP $\geq 130$ but $< 140$ mmHg and/or DBP $\geq 85$ but $< 90$ mmHg     |                                                                        |
| <b>Hypertension</b>               | 24-hour ambulatory BP    | SPB and/or DBP $\geq 95^{\text{th}}$ percentile for sex, age, and height, unless BP is equal to or higher than adult criteria thresholds (i.e. mean 24hr 130/80 mmHg; awake 135/85 mmHg; and sleep 125/75 mmHg) |                                                                        |
|                                   | Clinic BP                | $< 16$ years: SBP and/or DBP $\geq 95^{\text{th}}$ percentile for age and sex<br>$\geq 16$ years: SBP and/or DBP $\geq 140/90$ mmHg                                                                             |                                                                        |
| <b>Dyslipidaemia</b> <sup>1</sup> | HDL                      | $< 16$ years: $< 1.03$ mmol/L                                                                                                                                                                                   | Zimmet et al. 2007 <sup>19</sup>                                       |
|                                   |                          | $\geq 16$ years: males $< 1.03$ mmol/L; females $< 1.29$ mmol/L                                                                                                                                                 |                                                                        |
|                                   | LDL                      | $> 2.6$ mmol/L                                                                                                                                                                                                  | NCEP 2001 <sup>24</sup>                                                |

| OUTCOME                                     | PARAMETER         | THRESHOLDS FOR ABNORMAL RESULTS                                                                                                                                                                                                                                                                                                                                                                                                                                                                                                                                                                                                                                                                                                                                         | REFERENCE                                                              |
|---------------------------------------------|-------------------|-------------------------------------------------------------------------------------------------------------------------------------------------------------------------------------------------------------------------------------------------------------------------------------------------------------------------------------------------------------------------------------------------------------------------------------------------------------------------------------------------------------------------------------------------------------------------------------------------------------------------------------------------------------------------------------------------------------------------------------------------------------------------|------------------------------------------------------------------------|
|                                             | Triglycerides     | ≥1.7 mmol/L                                                                                                                                                                                                                                                                                                                                                                                                                                                                                                                                                                                                                                                                                                                                                             | Zimmet et al. 2007 <sup>19</sup>                                       |
|                                             | Total cholesterol | >5.2 mmol/L                                                                                                                                                                                                                                                                                                                                                                                                                                                                                                                                                                                                                                                                                                                                                             | European Atherosclerosis Society 1987 <sup>25</sup>                    |
| <b>Hyperuricaemia</b>                       | Uric acid         | Males ≥417 umol/L; females ≥340 umol/L                                                                                                                                                                                                                                                                                                                                                                                                                                                                                                                                                                                                                                                                                                                                  | Thefeld et al. 1973 <sup>26</sup>                                      |
| <b>Elevated CRP</b>                         | hsCRP             | <16 years: >2.8 mg/L<br>≥16 years ≥5.0 mg/L                                                                                                                                                                                                                                                                                                                                                                                                                                                                                                                                                                                                                                                                                                                             | Schlebusch et al. 2002 <sup>27</sup><br>Dati et al. 1996 <sup>28</sup> |
| <b>Abnormal liver function</b> <sup>1</sup> | ALP               | <15 years: males >468 U/L; females >254 U/L<br>≥15 but <17 years: males >331 U/L; females >117 U/L<br>≥17 years: males >149 U/L; females >87 U/L                                                                                                                                                                                                                                                                                                                                                                                                                                                                                                                                                                                                                        | Estey et al. 2013 <sup>29</sup>                                        |
|                                             | ALT               | Males >41 U/L; females >33 U/L                                                                                                                                                                                                                                                                                                                                                                                                                                                                                                                                                                                                                                                                                                                                          | Klein et al. 1994 <sup>30</sup>                                        |
|                                             | AST               | Males >40 U/L, females >32 U/L                                                                                                                                                                                                                                                                                                                                                                                                                                                                                                                                                                                                                                                                                                                                          | Thefeld et al. 1974 <sup>31</sup>                                      |
|                                             | GGT               | Males ≥60 U/L, females ≥40 U/L                                                                                                                                                                                                                                                                                                                                                                                                                                                                                                                                                                                                                                                                                                                                          | Thomas et al. 2005 <sup>32</sup>                                       |
| <b>Metabolic syndrome</b>                   |                   | ≥10 but <16 years:<br>Waist circumference ≥90th percentile (or adult cut-off if the latter is lower); AND any 2 of the following 4 criteria:<br>1. triglycerides ≥1.7 mmol/L<br>2. HDL <1.03 mmol/L<br>3. SBP ≥130 and/or DBP ≥85 mmHg<br>4. Fasting glucose ≥5.6 mmol/L and/or previously diagnosed type 2 diabetes<br><br>≥16 years:<br>Waist circumference ≥94 cm for males and ≥80 cm for females; AND any 2 of the following 4 criteria:<br>1. triglycerides ≥1.7mmol/L<br>2. HDL <1.03 mmol/L in males and <1.29 mmol/L in females; or specific treatment for these lipid abnormalities<br>3. SBP ≥130 mmHg and/or DBP ≥85 mmHg, or treatment for previously diagnosed hypertension<br>4. Fasting glucose ≥5.6 mmol/L and/or previously diagnosed type 2 diabetes | Zimmet et al. 2007 <sup>19</sup>                                       |

393 All blood samples were analysed using the Roche/Hitachi cobas c 311 systems, except insulin, which was measured using Elecsys and cobas e 411 immunoassay analyzers.

394 <sup>1</sup> Adverse outcome observed when any of the listed parameters are abnormal.

395

396

397

398 **3.6.9 EPOCH Measure of Adolescent Well-Being**

399

400 This questionnaire provides an assessment of five positive psychological characteristics  
401 (engagement, perseverance, optimism, connectedness, and happiness)<sup>33</sup>. For each  
402 characteristic, there are 4 items. Each item is scored on a 1 to 5 scale (almost never/not at all  
403 like me=1; almost always/very much like me=5). Scores are computed for each characteristic as  
404 the average of the four items. If the score for any item is missing, the average for each  
405 characteristic would be calculated using the total score of items answered divided by the number  
406 of items answered.

407

408 **3.6.10 Pediatric Quality of Life Inventory (PedsQL)**

409

410 We will adopt only the teen and young adult self-reports (*i.e.* not the parent-proxy), which assess  
411 problems over the preceding month relating to physical, emotional, social, and school  
412 functioning<sup>34</sup>. This questionnaire consists of 23 items comprising of 4 sections (physical  
413 functioning, emotional functioning, social functioning and school functioning). Each item is  
414 scored on a 0 to 4 scale (0= never; 4= almost always). Each score will then be transformed on a  
415 scale from 0 to 100 (0=100, 1=75, 2=50, 3=25, 4=0). If more than 50% of the items in the scale  
416 are missing, the scale scores should not be computed. Mean scores are the sum of the items  
417 over the number of items answered. We will also obtain the psychosocial health summary score  
418 and total score from the 4 sections. The psychosocial health summary score is sum of the items  
419 over the number of items answered in the emotional, social and school functioning sections. The  
420 total score is the sum of all items over the number of items answered on all sections.

421

422 **3.6.11 IBS symptoms**

423

424 The Birmingham IBS symptom questionnaire is a self-administered 11-item symptom  
425 questionnaire that is scored using the Rome II criteria<sup>35</sup>. There are 3 sections; pain, constipation  
426 and diarrhea. Each item is scored on a scale from 0 to 5 (0= none of the time; 5= all of the time).  
427 The total score is a sum of all 3 sections. If more than 50% of the items are missing, the scores  
428 should not be computed.

429

430 **3.6.12 Bowel movements**

431

432 The bowel movement questionnaire was designed for this trial to assess and monitor changes  
433 pre and post treatment. There are 5 items in the questionnaire. Item 1, 3, 4 and 5 are scored on  
434 a scale of 1 to 5. Item 2 is scored on a scale from 1 to 7. A higher score indicates a reduction in

435 bowel movement. If more than 50% of the items are missing, the scores should not be  
436 computed.

437

### 438 **3.6.13 Gut microbial composition**

439

440 Sample collection will be performed at baseline prior to treatment and at 6 weeks, 12 weeks and  
441 26 weeks post-treatment. Briefly, the participant will be given the bedpan liner (Onelink). They  
442 will be asked to:

443 i) pass urine into the toilet prior to placing the tray on the toilet seat;

444 ii) pass the stools;

445 iii) cover the tray and leave it in the bathroom for immediate collection by a research team  
446 member.

447 Using a small spatula, samples will be collected from three different areas of the stool (proximal,  
448 middle, and distal) and inserted into specimen containers (Onelink). The specimen containers  
449 will be immediately placed on ice and taken to the laboratory where they will be frozen and  
450 stored at -80°C. DNA and RNA extraction will be completed within 5 days of donation. Time to  
451 processing will be recorded.

452

453 Note that we will advise participants to try not to have a bowel movement in the morning prior to  
454 their visit, having it in the clinic instead. For those participants who are unable to produce a stool  
455 sample during their visit, they will be provided with a stool collection kit to take home and  
456 detailed instructions on how to collect the stool sample. This kit is made up of: i) instructions on  
457 how to use the stool collection kit; ii) specimen container; and iii) bedpan liner. Once the stool  
458 has been collected in the home environment, the specimen container it should be immediately  
459 placed into their home freezer, and kept there until it is delivered to the research team.

460

461 All extractions will be performed using Qiagen-AllPrep DNA/RNA mini kit®, due to variation in  
462 extraction efficiencies with the different kits<sup>36</sup>. However, once the DNA or RNA is extracted and  
463 archived, we will have a relatively stable record of the composition and activity of the flora.

464

465 Frozen faeces (~200 mg; weights will be recorded) will be subsampled from original faecal  
466 samples. All DNA and RNA isolations will be performed in a disinfected class II hood at room  
467 temperature. Briefly, stool samples will be incubated (10 min, room temperature) with vortexing  
468 (30 sec every 2 minutes) and treated with RLT Plus buffer (1.2mL; Qiagen) and 12µL beta-  
469 mercaptoethanol (Sigma-Aldrich). Acid-washed glass beads [1 ml; ≤106 µm (-140 U.S. sieve)  
470 (Sigma-Aldrich)] will be added to each sample and vortexed (10 min) on a TissueLyzer II  
471 (Qiagen). The supernatant will be removed and added to a QIAshredder spin column (Qiagen)

472 and centrifuged (9000 rpm, 2 min, room temperature). The eluent will be added to an AllPrep  
473 DNA (Qiagen) spin column and centrifuged (30 sec, 14000 rpm, room temperature). The eluent  
474 and AllPrep DNA spin columns will be used for RNA and DNA extraction, respectively, according  
475 to the manufacturer's instructions. Finally, DNA and RNA will be eluted with EB buffer and  
476 RNase-free water, respectively, and aliquots stored at -80°C for downstream mixed omics  
477 analysis.

478

479 A series of blank samples (sterile saline) will be extracted in parallel to sample extractions to  
480 enable contamination testing. We will also extract ZymoBIOMICS™ Microbial Community  
481 Standard I (Even, Cellular Mix; Catalog #D6300) to determine potential bias in the extraction  
482 process.

483

484 For 16S amplicon sequencing, library preparation will be performed using an Illumina platform by  
485 a commercial provider (to be determined) using standard protocols for the SV3-4 region.  
486 Shotgun metagenomics sequencing will be performed by a commercial provider (to be  
487 determined).

488

### 489 **3.7 Diet, physical activity, and socioeconomic status**

490

491 We will also be collecting data throughout the trial on lifestyle parameters that could possibly  
492 affect treatment outcomes, namely physical activity levels, dietary intake and socioeconomic  
493 status. Physical activity levels will be assessed via the IPAQ and ASAQ scores and the dietary  
494 intake will be assessed via the NZAFFQ questionnaire.

495

#### 496 **3.7.1 IPAQ**

497

498 The IPAQ assesses physical activity for 4 domains including work-related physical activity,  
499 transport-related physical activity, domestic and gardening activities and leisure time physical  
500 activity<sup>37,38</sup>. The items in the IPAQ are structured to provide separate domain specific scores for  
501 walking, moderate-intensity, and vigorous-intensity activity. Computation of the total scores  
502 requires summation of the duration (in minutes) and frequency (days) for all the types of  
503 activities in all domains. Domain specific scores require summation of the scores for walking,  
504 moderate-intensity, and vigorous-intensity activities (work-related physical activity, transport-  
505 related physical activity, domestic and gardening activities and leisure time physical activity).  
506 Total score will be a sum of all the domain specific scores. Activity-specific scores require  
507 summation of all the scores for the specific type of activity across domains (total vigorous  
508 activity, total moderate activity, total moderate and vigorous activity). We can also generate a  
509 categorical score (low, moderate and high) for the different levels of physical activity. The

510 amount of time spent sitting can be obtained from the time spent sitting during the weekday and  
511 weekend.

512

513 • Total MET-minutes/week at work = Walk (METs\*min\*days) + Mod (METs\*min\*days) + Vig  
514 (METs\*min\*days) at work

515 • Total MET-minutes/week for transportation = Walk (METs\*min\*days) + Cycle  
516 (METs\*min\*days) for transportation

517 • Total MET-minutes/week from domestic and garden = Vig (METs\*min\*days) yard work + Mod  
518 (METs\*min\*days) yard work + Mod (METs\*min\*days) inside chores

519 • Total MET-minutes/week in leisure-time = Walk (METs\*min\*days) + Mod (METs\*min\*days) +  
520 Vig (METs\*min\*days) in leisure-time

521 • Total Walking MET-minutes/week = Walk MET-minutes/week (at Work + for Transport + in  
522 Leisure)

523 • Total Moderate MET-minutes/week = Cycle MET-minutes/week for Transport + Mod MET-  
524 minutes/week (Work + Yard chores + Inside chores + Leisure) + Vigorous Yard chores MET-  
525 minutes

526 • Total Vigorous MET-minutes/week = Vig MET-minutes/week (at Work + in Leisure)

527

528 IPAQ categorical scoring:

529

530 1. Low: no activity is reported; OR

531 some activity is reported but not enough to meet Categories 2 or 3.

532

533 2. Moderate: One of the following 3 criteria is met:

534 a) 3 or more days of vigorous-intensity activity of at least 20 minutes per day; OR

535 b) 5 or more days of moderate-intensity activity and/or walking of at least 30  
536 minutes per day; OR

537 c) 5 or more days of any combination of walking, moderate-intensity or vigorous-  
538 intensity activities achieving a minimum of at least 600 MET-min/week.

539

540 3. High: One of the following 2 criteria is met:

541 a) vigorous-intensity activity on at least 3 days and accumulating at least 1500  
542 MET-minutes/week; OR

543 b) 7 or more days of any combination of walking, moderate- or vigorous- intensity  
544 activities accumulating at least 3000 MET-minutes/week.

545

546 Further details of the IPAQ scoring is provided in the Guidelines for Data Processing and  
547 Analysis of the International Physical Activity Questionnaire (IPAQ) <sup>38</sup>.

548

549 **3.7.2 ASAQ**

550

551 The ASAQ measures time spent in sedentary behaviours among adolescents <sup>39</sup>. There are 5  
552 domains that are assessed which include, small screen recreation, education, travel, cultural  
553 activities and social activities. Time spent during weekday and weekend in each domain is  
554 recorded to obtain total weekday, total weekend and total week scores.

555

556 **3.7.3 NZAFFQ**

557

558 The New Zealand Adolescent Food Frequency Questionnaire (NZAFFQ) <sup>40</sup> provides the  
559 frequency of eating different types of food groups. This information can be used to compare  
560 frequency of food group intake between the two intervention groups and across the duration of  
561 the intervention.

562

563 **3.7.4 3-day food diary**

564

565 This diary will also be used to describe all foods and fluids consumed over three days.  
566 Recipients will be asked to describe all foods and fluids consumed in detail including brand  
567 names, types of foods (e.g. low fat), and cooking methods. Quantities will be described using  
568 standard household measures, as well as the information from food labels (where appropriate).  
569 Recipients will be provided with standardized instructions for completing the dietary record by a  
570 trained investigator, who will also review individual records with recipients to clarify errors,  
571 omissions, questionable entries, or unclear descriptions. These dietary records will be entered  
572 into FoodWorks software (v9.0, Xyris Software, Brisbane, Australia) by a trained investigator.

573

574 **3.7.5 Socioeconomic status**

575

576 This is evaluated via the New Zealand indices of multiple deprivation (IMD) scores <sup>41</sup>. There are  
577 seven domains of deprivation; employment, income, crime, housing, health, education; and  
578 geographical access. The overall IMD score is the combination of these seven domains. To  
579 generate this scores, the participant's residential address is entered into qualtrics survey which  
580 will then convert the information provided into the scores.

581

582 **4 STATISTICAL METHODS**

583

584 The CONSORT 2010 guidelines will be followed in reporting the main trial results <sup>1,2</sup>. Data  
585 analyses will be performed in SAS v.9.4 (SAS Institute, Cary, NC, USA), SPSS v25 (IBM Corp,  
586 Armonk, NY, USA), and/or Minitab v.16 (Pennsylvania State University, State College, PA,  
587 USA). All statistical tests will be two-sided at  $p < 0.05$ , with no adjustments for multiple  
588 comparisons. Baseline demographics and clinical characteristics of recipients will be  
589 summarised by randomisation group. The distribution of outcome measures will be first  
590 evaluated using descriptive statistics. No interim analysis is planned for the trial.

591

#### 592 **4.1 Primary outcome analyses**

593

594 Treatment evaluation will be performed on the principle of intention to treat (ITT), using data  
595 collected from all randomised recipients.

596

597 A linear regression model will be used to assess the treatment effect between two groups on the  
598 primary outcome (BMI SDS) at 6 weeks, adjusting for the baseline outcome value and sex (i.e.  
599 stratification factor). Model-adjusted estimates and the differences between the two groups will  
600 be calculated with 95% confidence intervals.

601

602 Missing data on the primary outcome will be imputed using multiple imputations, which create  
603 multiple imputed datasets for the incomplete outcome variable that are analysed using same  
604 regression models and combined for one inference. The Markov chain Monte Carlo (MCMC)  
605 method will be used to produce the parameter estimates, assuming the data are from a  
606 multivariate normal distribution and are missing at random. The SAS procedure, PROC MI, will  
607 be used, and we plan to run 30 imputations to allow for both within and between imputation  
608 variances.

609

610 Per-protocol analyses may be carried out on those randomised participants without major  
611 protocol violations, which have been defined as any of the following:

612

613 • Extreme changes to dietary intake during the trial; ie starting on a new type of dieting  
614 programme

615

616 • Extreme changes to physical activity during the trial; ie starting a new type of high-intensity  
617 exercise

618

619 • diagnosed during the trial to have a medical condition listed under the exclusion criteria to be  
620 eligible for the trial (i.e. gastrointestinal disease, type 1 diabetes or monogenic diabetes that



621 requires being on medication that may potentially affect weight, metabolism or the gut  
622 microbiome)

623

624 • starting regular medications during the trial that may influence weight, metabolism or gut  
625 microbiome (i.e. oral contraceptives, metformin)

626

627 A protocol deviation form will be used to record all major protocol deviations, and reviewed in a  
628 blinded fashion by the trial steering group prior to final data lock. The per-protocol population will  
629 be analysed using same regression models as the primary ITT population to test the robustness  
630 of main trial findings.

631

632 Planned subgroup analysis by sex will be conducted to evaluate the consistency of main  
633 treatment effects in males and females, by including an interaction term between sex and  
634 treatment group in the main model. If a significant interaction effect is found, separate subgroup  
635 analyses will be conducted to estimate the treatment effects in specific subgroups.

636

637 Exploratory analyses may also be performed following the exact same procedures as previously  
638 described, accounting for the potential confounding effects of physical activity levels and dietary  
639 intake.

640

## 641 **4.2 Secondary outcome analyses**

642

643 Treatment evaluation will be performed on the principle of intention to treat (ITT), using data  
644 collected from all randomised recipients on previously specified secondary outcomes.  
645 Generalised linear mixed models will be used to evaluate the outcomes measured repeatedly  
646 over time, using a link function appropriate to the distribution of the outcome variable. The fixed-  
647 effect model will include the value of the respective outcome at baseline, sex (stratification  
648 factor), treatment group, visit, and the latter's interaction with treatment group. A random patient  
649 effect will be considered in modelling to take into account the correlation between the data  
650 collected from same participant. Model-adjusted group differences will be estimated at each  
651 clinical assessment with 95% confidence intervals. The interaction effect between treatment  
652 group and visit will be assessed.

## 653 **5 MICROBIOME DATA ANALYSIS**

654

### 655 **5.1 Initial bioinformatics**

656

657 The metagenomic sequencing data will be processed using bioBakery workflows using docker  
658 images available at [http://huttenhower.sph.harvard.edu/biobakery\\_workflows](http://huttenhower.sph.harvard.edu/biobakery_workflows). Briefly, sequence  
659 data quality control, including removal of any human reads, will be conducted using kneadData.  
660 Taxonomic and functional profiles of the microbiome will be generated using MetaPhlAn v2.6<sup>42</sup>  
661 and HUMAnN2<sup>43</sup>, respectively. Additionally, strain level taxonomic profiling will be achieved by  
662 SNP haplotype based profiling by StrainPhlAn software<sup>44</sup>. Quality control, read filtering,  
663 trimming and dereplication, read-pair joining, sequence denoising, chimera removal and  
664 sequence table construction of 16S rRNA amplicon sequencing data will be conducted using  
665 DADA2 R package<sup>45</sup>. Sequence taxonomies will be assigned using IDTAXA algorithm in  
666 DECIPHER R package<sup>46</sup>.

667

## 668 **5.2 Metagenomic assembly**

669

670 Metagenomic reads of each sample will be assembled into contigs separately using MegaHIT<sup>47</sup>.  
671 Open reading frames (ORFs) of the assembled contigs will be predicted using Prodigal<sup>48</sup>  
672 followed up by clustering the ORFs with >95% identity and 90% coverage into non-redundant  
673 gene clusters by CD-HIT<sup>49,50</sup>. The resulting non-redundant gene catalogue will be merged using  
674 existing gene catalogues to assure more comprehensive reference gene catalogue<sup>51,52</sup>. Gene  
675 abundance will be determined by mapping reads from the metagenomic samples to the gene  
676 catalogue using Burrows-Wheeler Aligner (BWA)<sup>53</sup>. The resulting gene abundance profiles will  
677 be used to construct microbial pangenomes using MPSminer<sup>54</sup>. Similarity between a pair of  
678 metagenomic strains (within the same species but in different samples) will be measured using  
679 the percentage of shared genes in the smallest of the two genomes<sup>55</sup>.

680

## 681 **5.3 Statistical comparisons**

682

683 The microbiomes of the treatment groups (FMT vs. placebo) will be compared using both  
684 omnibus (Permutational analysis of variance, PERMANOVA) and individual (linear mixed effects  
685 modeling) feature tests. Both taxonomic (based on 16S amplicon and metagenomic sequencing)  
686 and functional (metagenomic sequencing) profiles will be compared. Following comparisons for  
687 both sexes separately (males and females) and all data as an aggregate (but by controlling sex  
688 as a covariate) will be included:

689 1) Compare first post-treatment samples to look for consistent post-treatment  
690 differences between the groups.

691 2) Compare pre- and post-treatment alpha-diversities, and shifts in alpha-diversity  
692 between the groups.

- 693            3) Compare microbial stability (Bray-Curtis dissimilarity and change in any individual  
694            taxa) over the treatment between the groups.
- 695            4) Compare pre- and post-treatment similarities to donors (as an aggregate and  
696            individually) between groups.
- 697

698 **5.4 Engraftment analysis**

699

700 We will use the SNP haplotypes from StrainPhlAn<sup>44</sup> to investigate microbial engraftment at the  
701 strain level. We will first select a sequence similarity threshold for matching donor-recipient  
702 strains by using the placebo group as a negative control; no strain transfer (or engraftment)  
703 should be observed in placebo group. We will then treat all donor strains with higher than this  
704 previously selected sequence similarity in recipient stool as successfully engrafted strains. We  
705 will quantify engraftment per participant by counting the number of engrafted strains and by  
706 measuring their total abundance in the recipient gut microbiome. We will then correlate these  
707 engraftment measures to other clinical data, such as weight loss, quality of life and reported  
708 post-treatment adverse effects.

709 The metagenomic assemblies will be used to confirm the results of SNP haplotype based  
710 analysis above and to discover engraftment of genomes that are missing or not well-presented  
711 in the reference databases. As above, the gene content similarity threshold for matching donor-  
712 recipient strains will be determined experimentally using the placebo group as a negative  
713 control. The metagenomic assemblies will also be used to discover rare genes that are shared  
714 between donor-recipient pairs and which may participate in the trophic cascade following the  
715 FMT.

716

717 **5.5 Identification of super-donor behavior**

718

719 We will analyse the data to identify any evidence supporting the existence of super-donor(s) in  
720 this study using the following tests:

- 721 1) Measure recipient shifts (in Bray-Curtis dissimilarity and Jaccard Index) towards all  
722 donor microbiome profiles separately and compare these shifts using ANOVA.
- 723 2) Compare donors by counting the engrafted strains (and their relative abundance) as  
724 identified as above.
- 725 3) Assess any anecdotal trends and associations between donor alpha diversities and  
726 engraftment of their strains.

727

728 **6 REPORTING OF TRIAL RESULTS**

729

730 **6.1 Baseline characteristics**

731

732 **Table 7.** Baseline demographic and clinical characteristics of participants

|                                 | Placebo                      | Treatment |
|---------------------------------|------------------------------|-----------|
| n                               |                              |           |
| Age (years)                     |                              |           |
| Sex (males)                     |                              |           |
| Socioeconomic deprivation (IMD) |                              |           |
| Ethnicity                       | NZ European                  |           |
|                                 | Maori                        |           |
|                                 | Pacific Islander             |           |
|                                 | Other ethnicities            |           |
| Anthropometry                   | Height (cm)                  |           |
|                                 | Weight (kg)                  |           |
|                                 | Class 1 obesity (%)          |           |
|                                 | Class 2 obesity (%)          |           |
|                                 | Class 3 obesity (%)          |           |
| Body composition                | Total body fat (%)           |           |
| Glucose homeostasis             | Elevated fasting glucose (%) |           |
|                                 | Elevated insulin (%)         |           |
| Blood pressure                  | Pre-hypertension (%)         |           |
|                                 | Hypertension (%)             |           |
| Lipid profile                   | Dyslipidaemia (%)            |           |
| Liver function                  | Abnormal (%)                 |           |

733 **6.2 Study outcomes**

734

735 **Table 8.** Primary outcome- BMI SDS at 6 weeks post-intervention. Data are means and the respective 95%  
736 confidence intervals.

|             | Treatment             |                      | Placebo               |                      | Adjusted difference<br>(95% CI) |
|-------------|-----------------------|----------------------|-----------------------|----------------------|---------------------------------|
|             | Baseline<br>(mean,SD) | 6 weeks<br>(mean,SD) | Baseline<br>(mean,SD) | 6 weeks<br>(mean,SD) |                                 |
| ITT BMI SDS |                       |                      |                       |                      |                                 |
| PP BMI SDS  |                       |                      |                       |                      |                                 |

737

738  
739  
740

**Table 9.** Clinical outcomes at baseline, 6, 12 and 26 weeks post-intervention. Data are means and the respective 95% confidence intervals.

|                       |                                 | Baseline  |         | 6 weeks   |         |            | 12 weeks  |         |            | 26 weeks  |         |            |
|-----------------------|---------------------------------|-----------|---------|-----------|---------|------------|-----------|---------|------------|-----------|---------|------------|
|                       |                                 | Treatment | Placebo | Treatment | Placebo | Difference | Treatment | Placebo | Difference | Treatment | Placebo | Difference |
| Anthropometry         | Waist circumference (cm)        |           |         |           |         |            |           |         |            |           |         |            |
|                       | Hip circumference (cm)          |           |         |           |         |            |           |         |            |           |         |            |
| Body composition      | Total body fat (%)              |           |         |           |         |            |           |         |            |           |         |            |
|                       | Android: gynoid fat ratio       |           |         |           |         |            |           |         |            |           |         |            |
| Glucose homeostasis   | Matsuda index                   |           |         |           |         |            |           |         |            |           |         |            |
|                       | Fasting plasma glucose (mmol/L) |           |         |           |         |            |           |         |            |           |         |            |
|                       | Fasting insulin (uU/ml)         |           |         |           |         |            |           |         |            |           |         |            |
|                       | HOMA-IR                         |           |         |           |         |            |           |         |            |           |         |            |
| Clinic blood pressure | HbA1c (mmol/mol)                |           |         |           |         |            |           |         |            |           |         |            |
|                       | Systolic (mmHg)                 |           |         |           |         |            |           |         |            |           |         |            |
|                       | Diastolic (mmHg)                |           |         |           |         |            |           |         |            |           |         |            |
| Lipid profile         | Total cholesterol (mmol/L)      |           |         |           |         |            |           |         |            |           |         |            |
|                       | LDL (mmol/L)                    |           |         |           |         |            |           |         |            |           |         |            |
|                       | HDL (mmol/L)                    |           |         |           |         |            |           |         |            |           |         |            |
|                       | Triglycerides (mmol/L)          |           |         |           |         |            |           |         |            |           |         |            |
|                       | Total cholesterol / HDL         |           |         |           |         |            |           |         |            |           |         |            |
|                       | Triglycerides / HDL             |           |         |           |         |            |           |         |            |           |         |            |
| Inflammatory markers  | Uric acid (umol/L)              |           |         |           |         |            |           |         |            |           |         |            |
|                       | hsCRP (mg/L)                    |           |         |           |         |            |           |         |            |           |         |            |
| Liver function        | ALP                             |           |         |           |         |            |           |         |            |           |         |            |
|                       | ALT                             |           |         |           |         |            |           |         |            |           |         |            |
|                       | AST                             |           |         |           |         |            |           |         |            |           |         |            |
|                       | GGT                             |           |         |           |         |            |           |         |            |           |         |            |

741  
742

743 **Table 10.** Health-related quality of life outcomes at Baseline, 6, 12 and 26 weeks post-intervention. Data are means and the respective 95% confidence intervals.

744

|                        |                       | Baseline  |         | 6 weeks   |         |            | 12 weeks  |         |            | 26 weeks  |         |            |
|------------------------|-----------------------|-----------|---------|-----------|---------|------------|-----------|---------|------------|-----------|---------|------------|
|                        |                       | Treatment | Placebo | Treatment | Placebo | Difference | Treatment | Placebo | Difference | Treatment | Placebo | Difference |
| <b>EPOCH</b>           | Engagement            |           |         |           |         |            |           |         |            |           |         |            |
|                        | Perseverance          |           |         |           |         |            |           |         |            |           |         |            |
|                        | Optimism              |           |         |           |         |            |           |         |            |           |         |            |
|                        | Connectedness         |           |         |           |         |            |           |         |            |           |         |            |
|                        | Happiness             |           |         |           |         |            |           |         |            |           |         |            |
| <b>PedsQL</b>          | Physical functioning  |           |         |           |         |            |           |         |            |           |         |            |
|                        | Emotional functioning |           |         |           |         |            |           |         |            |           |         |            |
|                        | Social functioning    |           |         |           |         |            |           |         |            |           |         |            |
|                        | School functioning    |           |         |           |         |            |           |         |            |           |         |            |
|                        | Psychosocial health   |           |         |           |         |            |           |         |            |           |         |            |
|                        | Total                 |           |         |           |         |            |           |         |            |           |         |            |
| <b>IBS symptoms</b>    | Pain                  |           |         |           |         |            |           |         |            |           |         |            |
|                        | Constipation          |           |         |           |         |            |           |         |            |           |         |            |
|                        | Diarrhoea             |           |         |           |         |            |           |         |            |           |         |            |
|                        | Total                 |           |         |           |         |            |           |         |            |           |         |            |
| <b>Bowel movements</b> | Total                 |           |         |           |         |            |           |         |            |           |         |            |

745

746 **Table 11.** Microbial alpha- and beta-diversities post-intervention. Data are means and the respective 95% confidence  
 747 intervals.  
 748

|                                         | Placebo | Treatment | Difference | <i>p</i> |
|-----------------------------------------|---------|-----------|------------|----------|
| <b>n</b>                                |         |           |            |          |
| <b>Alpha-diversity</b>                  |         |           |            |          |
| at 6 weeks                              |         |           |            |          |
| at 12 weeks                             |         |           |            |          |
| at 26 weeks                             |         |           |            |          |
| change compared to baseline at 6 weeks  |         |           |            |          |
| change compared to baseline at 12 weeks |         |           |            |          |
| change compared to baseline at 26 weeks |         |           |            |          |
| <b>Beta-diversity</b>                   |         |           |            |          |
| between baseline and 6 weeks            |         |           |            |          |
| between baseline and 12 weeks           |         |           |            |          |
| between baseline and 26 weeks           |         |           |            |          |
| between donor stool                     |         |           |            |          |

749

750 **Table 12.** Associations between study variables and microbial taxa. Effect sizes are differences of means between  
 751 the groups or correlation coefficients.

| Study variable | Bacterial taxon | Effect size | n | <i>p</i> | FDR corrected <i>p</i> |
|----------------|-----------------|-------------|---|----------|------------------------|
|----------------|-----------------|-------------|---|----------|------------------------|

752

753

754

755

756

757

758

759

760

761

762

763

764

765

766

767



768 **Table 13.** Outcome variables for Gut Bugs Trial's main manuscript

769 \*Indicates categorical (binary) outcomes, as defined in Table 6

770 [ ] Analysis of potential treatment effects on individual components may not be carried out in the absence of overall differences.  
771

|                               |                            | OUTCOMES                            | TIME POINTS     |
|-------------------------------|----------------------------|-------------------------------------|-----------------|
| <b>PRIMARY OUTCOME</b>        |                            |                                     |                 |
| <b>Anthropometry</b>          |                            | BMI SDS                             | 6 weeks         |
| <b>SECONDARY OUTCOMES</b>     |                            |                                     |                 |
| <b>Anthropometry</b>          |                            | BMI SDS                             | 12, 26 weeks    |
|                               |                            | Waist circumference (cm)            | 6, 12, 26 weeks |
|                               |                            | Waist-to-height ratio               | 6, 12, 26 weeks |
| <b>Body composition (DXA)</b> |                            | Total body fat (%)                  | 6, 12, 26 weeks |
|                               |                            | Android-to-gynoid fat ratio         | 6, 12, 26 weeks |
|                               |                            | Total lean mass (kg)                | 6, 12, 26 weeks |
| <b>Blood pressure</b>         | <b>Clinic</b>              | Median systolic BP (mmHg)           | 6, 12, 26 weeks |
|                               |                            | Median diastolic BP (mmHg)          | 6, 12, 26 weeks |
|                               |                            | *Pre-hypertension                   | 6, 12, 26 weeks |
|                               |                            | *Hypertension                       | 6, 12, 26 weeks |
|                               | <b>24-hour</b>             | Awake mean systolic BP (mmHg)       | 6 weeks         |
|                               |                            | Awake mean diastolic BP (mmHg)      | 6 weeks         |
|                               |                            | Sleep mean systolic BP (mmHg)       | 6 weeks         |
|                               |                            | Sleep mean diastolic BP (mmHg)      | 6 weeks         |
|                               |                            | Systolic dip (%)                    | 6 weeks         |
|                               |                            | Diastolic dip (%)                   | 6 weeks         |
|                               |                            | *Pre-hypertension                   | 6 weeks         |
|                               |                            | *Hypertension                       | 6 weeks         |
| <b>Metabolism</b>             | <b>Glucose homeostasis</b> | Insulin sensitivity (Matsuda Index) | 6, 12, 26 weeks |
|                               |                            | Fasting insulin (uU/ml)             | 6, 12, 26 weeks |
|                               |                            | Fasting glucose (mmol/L)            | 6, 12, 26 weeks |
|                               |                            | HbA1c (mmol/mol)                    | 6, 12, 26 weeks |
|                               |                            | HOMA-IR                             | 6, 12, 26 weeks |
|                               |                            | *Elevated fasting glucose           | 6, 12, 26 weeks |

|                                       |                             | <b>OUTCOMES</b>                    | <b>TIME POINTS</b> |
|---------------------------------------|-----------------------------|------------------------------------|--------------------|
|                                       |                             | *Elevated 1-hour glucose           | 6, 12, 26 weeks    |
|                                       |                             | *Elevated 2-hour glucose           | 6, 12, 26 weeks    |
|                                       |                             | *Pre-diabetes or diabetes on HbA1c | 6, 12, 26 weeks    |
|                                       | <b>Liver function</b>       | ALP (U/L)                          | 6, 12, 26 weeks    |
|                                       |                             | ALT (U/L)                          | 6, 12, 26 weeks    |
|                                       |                             | AST (U/L)                          | 6, 12, 26 weeks    |
|                                       |                             | GGT (U/L)                          | 6, 12, 26 weeks    |
|                                       |                             | *Abnormal liver function           | 6, 12, 26 weeks    |
|                                       | <b>Lipid profile</b>        | Total cholesterol (mmol/L)         | 6, 12, 26 weeks    |
|                                       |                             | HDL (mmol/L)                       | 6, 12, 26 weeks    |
|                                       |                             | Triglycerides (mmol/L)             | 6, 12, 26 weeks    |
|                                       |                             | LDL (mmol/L)                       | 6, 12, 26 weeks    |
|                                       |                             | Triglycerides/HDL                  | 6, 12, 26 weeks    |
|                                       |                             | *Dyslipidaemia                     | 6, 12, 26 weeks    |
|                                       | <b>Inflammatory markers</b> | High-sensitivity CRP (mg/L)        | 6, 12, 26 weeks    |
|                                       |                             | Uric acid (mmol/L)                 | 6, 12, 26 weeks    |
|                                       | <b>*Metabolic syndrome</b>  |                                    | 6, 12, 26 weeks    |
| <b>Health-related quality of life</b> | <b>EPOCH</b>                | [Engagement]                       | [6, 12, 26 weeks]  |
|                                       |                             | [Perseverance]                     | [6, 12, 26 weeks]  |
|                                       |                             | [Optimism]                         | [6, 12, 26 weeks]  |
|                                       |                             | [Connectedness]                    | [6, 12, 26 weeks]  |
|                                       |                             | [Happiness]                        | [6, 12, 26 weeks]  |
|                                       | <b>Peds QL</b>              | Total score                        | 6, 12, 26 weeks    |
|                                       |                             | [Physical health]                  | [6, 12, 26 weeks]  |
|                                       |                             | [Emotional]                        | [6, 12, 26 weeks]  |
|                                       |                             | [Social]                           | [6, 12, 26 weeks]  |
|                                       |                             | [School]                           | [6, 12, 26 weeks]  |
|                                       |                             | [Psychosocial]                     | [6, 12, 26 weeks]  |

|                   |                        | <b>OUTCOMES</b> | <b>TIME POINTS</b> |
|-------------------|------------------------|-----------------|--------------------|
| <b>Gut health</b> | <b>IBS symptoms</b>    | Total score     | 6, 12, 26 weeks    |
|                   |                        | Pain            | 6, 12, 26 weeks    |
|                   |                        | Constipation    | 6, 12, 26 weeks    |
|                   |                        | Diarrhoea       | 6, 12, 26 weeks    |
|                   | <b>Bowel movements</b> | Total score     | 6, 12, 26 weeks    |

772

773 **7 REFERENCES**

774

775

776

777

778

779

780

781

782

783

784

785

786

787

788

789

790

791

792

793

794

795

796

797

798

799

800

801

802

803

804

805

806

807

808

809

810

811

812

813

814

815

816

817

818

819

820

821

822

823

824

825

826

827

828

829

830

831

832

833

834

835

836

837

838

839

1. Moher D, Hopewell S, Schulz KF, et al. CONSORT 2010 explanation and elaboration: updated guidelines for reporting parallel group randomised trials. *Int J Surg*. 2012;10(1):28-55.
2. Schulz KF, Altman DG, Moher D. CONSORT 2010 statement: updated guidelines for reporting parallel group randomised trials. *BMC Med*. 2010;8(1):18.
3. Chan AW, Tetzlaff JM, Altman DG, et al. SPIRIT 2013 statement: defining standard protocol items for clinical trials. *Ann Intern Med*. 2013;158(3):200-207.
4. New Zealand Blood Service. Detailed eligibility criteria. 2015.
5. Bibby K, Peccia J. Identification of viral pathogen diversity in sewage sludge by metagenome analysis. *Environ Sci Technol*. 2013;47(4):1945-1951.
6. Lacy BE, Patel NK. Rome criteria and a diagnostic approach to irritable bowel syndrome. *Journal of clinical medicine*. 2017;6(11).
7. Vanner SJ, Depew WT, Paterson WG, et al. Predictive value of the Rome criteria for diagnosing the irritable bowel syndrome. *Am J Gastroenterol*. 1999;94(10):2912-2917.
8. Sealed Envelope Ltd. Create a blocked randomisation list. 2016; <https://www.sealedenvelope.com/simple-randomiser/v1/lists>. Accessed 3 Mar 2017.
9. Bang H, Ni L, Davis CE. Assessment of blinding in clinical trials. *Control Clin Trials*. 2004;25(2):143-156.
10. Moroz A, Freed B, Tiedemann L, Bang H, Howell M, Park JJ. Blinding measured: a systematic review of randomized controlled trials of acupuncture. *Evid Based Complement Alternat Med*. 2013;2013(708251):12.
11. O'Brien PE, Sawyer SM, Laurie C, et al. Laparoscopic adjustable gastric banding in severely obese adolescents: a randomized trial. *JAMA*. 2010;303(6):519-526.
12. de Onis M, Blossner M, Borghi E. Global prevalence and trends of overweight and obesity among preschool children. *Am J Clin Nutr*. 2010;92(5):1257-1264.
13. Imboden MT, Welch WA, Swartz AM, et al. Reference standards for body fat measures using GE dual energy x-ray absorptiometry in Caucasian adults. *PLoS One*. 2017;12(4):e0175110-e0175110.
14. Matsuda M, DeFronzo RA. Insulin sensitivity indices obtained from oral glucose tolerance testing: comparison with the euglycemic insulin clamp. *Diabetes Care*. 1999;22(9):1462-1470.
15. Matsuda M, DeFronzo R. Insulin sensitivity indices obtained from oral glucose tolerance testing: comparison with the euglycemic insulin clamp. *Diabetes Care*. 1999;22(9):1462-1470.
16. Wallace TM, Levy JC, Matthews DR. Use and abuse of HOMA modeling. *Diabetes Care*. 2004;27(6):1487-1495.
17. Lurbe E, Agabiti-Rosei E, Cruickshank JK, et al. 2016 European Society of Hypertension guidelines for the management of high blood pressure in children and adolescents. *J Hypertens*. 2016;34(10):1887-1920.
18. O'Brien E, Asmar R, Beilin L, et al. European Society of Hypertension recommendations for conventional, ambulatory and home blood pressure measurement. *J Hypertens*. 2003;21(5):821-848.
19. Zimmet P, Alberti KGM, Kaufman F, et al. The metabolic syndrome in children and adolescents—an IDF consensus report. *Pediatr Diabetes*. 2007;8(5):299-306.
20. Eisenmann JC. Waist circumference percentiles for 7- to 15-year-old Australian children. *Acta Paediatr*. 2005;94(9):1182-1185.
21. American Diabetes Association. Classification and Diagnosis of Diabetes: Standards of Medical Care in Diabetes 2018. *Diabetes Care*. 2018;41(Supplement 1):S13-S27.
22. Fiorentino TV, Marini MA, Succurro E, et al. One-hour postload hyperglycemia: implications for prediction and prevention of type 2 diabetes. *J Clin Endocrinol Metab*. 2018;103(9):3131-3143.
23. Frithioff-Bøjsøe C, Lund MA, Kloppenborg JT, et al. Glucose metabolism in children and adolescents: population-based reference values and comparisons to children and adolescents enrolled in obesity treatment. *Pediatr Diabetes*. 2019;20(5):538-548.
24. NCEP Expert Panel. Executive Summary of The Third Report of The National Cholesterol Education Program (NCEP) Expert Panel on Detection, Evaluation, And Treatment of High Blood Cholesterol In Adults (Adult Treatment Panel III). *JAMA*. 2001;285(19):2486-2497.
25. European Atherosclerosis Society. Strategies for the prevention of coronary heart disease: a policy statement of the European Atherosclerosis Society. *Eur Heart J*. 1987;8(1):77-88.
26. Thefeld W, Hoffmeister H, Busch E-W, Koller P, Vollmar J. [Normal values of serum uric acid depending on age and sex with one new enzymatic uric acid color test]. *Dtsch Med Wochenschr*. 1973;98(8):380-384.
27. Schlebusch H, Liappis N, Kalina E, Klein C. High sensitive CRP and creatinine: reference intervals from infancy to childhood. *J Lab Med*. 2002;26(5-6):341-346.
28. Dati F, Schumann G, Thomas L, et al. Consensus of a group of professional societies and diagnostic companies on guidelines for interim reference ranges for 14 proteins in serum based on the standardization against the IFCC/BCR/CAP reference material (CRM 470). *Eur J Clin Chem Clin Biochem*. 1996;34(6):517-520.
29. Estey MP, Cohen AH, Colantonio DA, et al. CLSI-based transference of the CALIPER database of pediatric reference intervals from Abbott to Beckman, Ortho, Roche and Siemens Clinical Chemistry Assays: direct validation using reference samples from the CALIPER cohort. *Clin Biochem*. 2013;46(13-14):1197-1219.
30. Klein G, Lehmann P, Michel E, Regenauer H. [Comparison of the IFCC methods for ALT, AST and GGT at 37°C with the established standard methods at 25°C and 37°C]. *Lab Med*. 1994;18:403-404.
31. Thefeld W, Hoffmeister H, Busch E-W, Koller P, Vollmar J. [Reference values for the determinations of the transaminases GOT and GPT as well as serum alkaline phosphatase using optimized standard methods]. *Dtsch Med Wochenschr*. 1974;99(8):343-351.
32. Thomas L, Müller M, Schumann G, et al. Consensus of DGKL and VDGH for interim reference intervals on enzymes in serum *J Lab Med*. 2005;29(5):301-308.
33. Kern ML, Benson L, Steinberg EA, Steinberg L. The EPOCH Measure of Adolescent Well-Being. *Psychol Assess*. 2016;28(5):586-597.
34. Varni JW, Seid M, Knight TS, Uzark K, Szer IS. The PedsQL 4.0 Generic Core Scales: sensitivity, responsiveness, and impact on clinical decision-making. *J Behav Med*. 2002;25(2):175-193.
35. Roalfe AK, Roberts LM, Wilson S. Evaluation of the Birmingham IBS symptom questionnaire. *BMC Gastroenterol*. 2008;8:30.

- 840 36. Claassen S, du Toit E, Kaba M, Moodley C, Zar HJ, Nicol MP. A comparison of the efficiency of five different commercial DNA extraction  
841 kits for extraction of DNA from faecal samples. *J Microbiol Methods*. 2013;94(2):103-110.
- 842 37. Hagströmer M, Oja P, Sjöström M. The International Physical Activity Questionnaire (IPAQ): a study of concurrent and construct validity.  
843 *Public Health Nutr*. 2006;9(6):755-762.
- 844 38. IPAQ. Guidelines for data processing and analysis of the International Physical Activity Questionnaire (IPAQ)-short and long forms. 2005.
- 845 39. Hardy LL, Booth ML, Okely AD. The reliability of the adolescent sedentary activity questionnaire (ASAQ). *Prev Med*. 2007;45(1):71-74.
- 846 40. Wong JE, Parnell WR, Black KE, Skidmore PM. Reliability and relative validity of a food frequency questionnaire to assess food group  
847 intakes in New Zealand adolescents. *Nutr J*. 2012;11(1):65.
- 848 41. Exeter D, Browne MM, Crengle S, Lee A, Zhao J. New Zealand Indices of Multiple Deprivation (IMD). *PLoS One*. 2016;12(8):e0181260.
- 849 42. Segata N, Waldron L, Ballarini A, Narasimhan V, Jousson O, Huttenhower C. Metagenomic microbial community profiling using unique  
850 clade-specific marker genes. *Nat Methods*. 2012;9(8):811-814.
- 851 43. Franzosa EA, McIver LJ, Rahnavard G, et al. Species-level functional profiling of metagenomes and metatranscriptomes. *Nat Methods*.  
852 2018;15:962–968.
- 853 44. Truong DT, Tett A, Pasolli E, Huttenhower C, Segata N. Microbial strain-level population structure and genetic diversity from metagenomes.  
854 *Genome Res*. 2017;27(4):626-638.
- 855 45. Callahan BJ, McMurdie PJ, Rosen MJ, Han AW, Johnson AJ, Holmes SP. DADA2: High-resolution sample inference from Illumina amplicon  
856 data. *Nat Methods*. 2016;13(7):581-583.
- 857 46. Murali A, Bhargava A, Wright ES. IDTAXA: a novel approach for accurate taxonomic classification of microbiome sequences. *Microbiome*.  
858 2018;6(1):140.
- 859 47. Li D, Liu CM, Luo R, Sadakane K, Lam TW. MEGAHIT: an ultra-fast single-node solution for large and complex metagenomics assembly  
860 via succinct de Bruijn graph. *Bioinformatics*. 2015;31(10):1674-1676.
- 861 48. Hyatt D, Chen GL, Locascio PF, Land ML, Larimer FW, Hauser LJ. Prodigal: prokaryotic gene recognition and translation initiation site  
862 identification. *BMC Bioinformatics*. 2010;11:119.
- 863 49. Qin J, Li R, Raes J, et al. A human gut microbial gene catalogue established by metagenomic sequencing. *Nature*. 2010;464(7285):59-65.
- 864 50. Fu L, Niu B, Zhu Z, Wu S, Li W. CD-HIT: accelerated for clustering the next-generation sequencing data. *Bioinformatics*. 2012;28(23):3150-  
865 3152.
- 866 51. Li J, Jia H, Cai X, et al. An integrated catalog of reference genes in the human gut microbiome. *Nat Biotechnol*. 2014;32(8):834-841.
- 867 52. Vatanen T, Plichta DR, Somani J, et al. Genomic variation and strain-specific functional adaptation in the human gut microbiome during  
868 early life. *Nat Microbiol*. 2018.
- 869 53. Li H, Durbin R. Fast and accurate short read alignment with Burrows-Wheeler transform. *Bioinformatics*. 2009;25(14):1754-1760.
- 870 54. Plaza Onate F, Le Chatelier E, Almeida M, et al. MSPminer: abundance-based reconstitution of microbial pan-genomes from shotgun  
871 metagenomic data. *Bioinformatics*. 2018.
- 872 55. Snel B, Bork P, Huynen MA. Genome phylogeny based on gene content. *Nat Genet*. 1999;21(1):108-110.

873
