# Supplementary material for: Effects of Fecal Microbiome Transfer in Adolescents With Obesity: The Gut Bugs Randomized Controlled Trial
Source: PubMed Central journal article supplement (PMC7753902; doi:10.1001/jamanetworkopen.2020.30415), 2020-12-21
Supplement: jamanetwopen-e2030415-s003.pdf [file jamanetwopen-e2030415-s003.pdf]

## Supplemental Online Content

Leong KSW, Jayasinghe TN, Wilson BC, et al. Effects of fecal microbiome transfer in adolescents with obesity: the Gut Bugs randomized controlled trial. *JAMA Netw Open*. 2020;3(12):e2030415. doi:10.1001/jamanetworkopen.2020.30415

**eTable 1.** Android-to-Gynoid-Fat (A/G) Ratio at 6, 12, and 26 Weeks Postintervention Among Female and Male Adolescents

**eTable 2.** Secondary Outcomes at 6, 12, and 26 Weeks Postintervention

**eTable 3.** BMI SDS and Glucose Metabolism of Participants with Metabolic Syndrome at Baseline

**eTable 4.** Changes in Prevalence of Metabolic Syndrome Among Participants with Metabolic Syndrome at Baseline

**eTable 5.** Variance of Species Taxonomic Profiles (Bray-Curtis Dissimilarity) Explained by Each Covariate in Cross-sectional PERMANOVA

**eTable 6.** Variance of Species Taxonomic Profiles (Bray-Curtis dissimilarity) Explained by Each Covariate in PERMANOVA for Donors and Recipients at Baseline

**eTable 7.** Definitions of Abnormal Outcomes

### **eReferences.**

This supplemental material has been provided by the authors to give readers additional information about their work.

**eTable 1.** Android-to-Gynoid-Fat (A/G) Ratio at 6, 12, and 26 Weeks Postintervention Among Female and Males Adolescents

|                |                  | Visit (weeks) | FMT |               | Placebo |               | aMD (95% CI)            | p-value |
|----------------|------------------|---------------|-----|---------------|---------|---------------|-------------------------|---------|
|                |                  |               | N   | mean ± SD     | N       | mean ± SD     |                         |         |
| <b>Females</b> | <b>A/G ratio</b> | <b>0</b>      | 25  | 1·027 ± 0·088 | 26      | 1·032 ± 0·057 |                         |         |
|                |                  | <b>6</b>      | 24  | 1·013 ± 0·085 | 26      | 1·047 ± 0·074 | -0·029 (-0·053, -0·005) | 0·018   |
|                |                  | <b>12</b>     | 23  | 1·015 ± 0·084 | 23      | 1·054 ± 0·064 | -0·028 (-0·054, -0·003) | 0·027   |
|                |                  | <b>26</b>     | 22  | 1·008 ± 0·084 | 24      | 1·050 ± 0·059 | -0·030 (-0·055, -0·006) | 0·017   |
| <b>Males</b>   | <b>A/G ratio</b> | <b>0</b>      | 17  | 1·189 ± 0·078 | 19      | 1·131 ± 0·082 |                         |         |
|                |                  | <b>6</b>      | 15  | 1·191 ± 0·103 | 18      | 1·146 ± 0·106 | -0·015 (-0·051, 0·021)  | 0·41    |
|                |                  | <b>12</b>     | 15  | 1·188 ± 0·078 | 18      | 1·148 ± 0·110 | -0·023 (-0·060, 0·013)  | 0·20    |
|                |                  | <b>26</b>     | 15  | 1·173 ± 0·094 | 17      | 1·142 ± 0·095 | -0·035 (-0·072, 0·003)  | 0·071   |

Adjusted mean differences (aMD) and 95% confidence intervals (CI).

FMT, fecal microbiome transfer; SD, standard deviation.

P-values <0.05 were deemed statistically significant.

**eTable 2.** Secondary Outcomes at 6, 12, and 26 Weeks Postintervention

|                             |                                   | Visit (weeks) | FMT         |              | Placebo     |                     | aMD (95% CI)        | p-value |
|-----------------------------|-----------------------------------|---------------|-------------|--------------|-------------|---------------------|---------------------|---------|
|                             |                                   |               | N           | mean ± SD    | N           | mean ± SD           |                     |         |
| <b>24hAMBP</b>              | <b>Awake SBP (mmHg)</b>           | <b>0</b>      | 42          | 118.5 ± 8.7  | 45          | 118.4 ± 10.0        |                     |         |
|                             |                                   | <b>6</b>      | 40          | 119.4 ± 9.6  | 43          | 116.4 ± 8.6         | 3.0 (0.6, 5.5)      | 0.015   |
|                             |                                   | <b>26</b>     | 40          | 119.4 ± 9.6  | 43          | 116.4 ± 8.6         | 3.0 (0.6, 5.5)      | 0.015   |
|                             | <b>Awake DBP (mmHg)</b>           | <b>0</b>      | 42          | 69.3 ± 5.0   | 45          | 69.8 ± 5.8          |                     |         |
|                             |                                   | <b>6</b>      | 40          | 69.1 ± 6.3   | 43          | 68.4 ± 5.9          | 1.1 (-1.0, 3.2)     | 0.30    |
|                             |                                   | <b>26</b>     | 40          | 69.1 ± 6.3   | 43          | 68.4 ± 5.9          | 1.1 (-1.0, 3.2)     | 0.30    |
|                             | <b>Asleep SBP (mmHg)</b>          | <b>0</b>      | 42          | 107.0 ± 10.9 | 45          | 105.4 ± 8.2         |                     |         |
|                             |                                   | <b>6</b>      | 40          | 107.5 ± 10.9 | 43          | 105.2 ± 9.3         | 1.2 (-1.7, 4.2)     | 0.40    |
|                             |                                   | <b>26</b>     | 40          | 107.5 ± 10.9 | 43          | 105.2 ± 9.3         | 1.2 (-1.7, 4.2)     | 0.40    |
|                             | <b>Asleep DBP (mmHg)</b>          | <b>0</b>      | 42          | 57.0 ± 6.1   | 45          | 57.4 ± 6.4          |                     |         |
|                             |                                   | <b>6</b>      | 40          | 58.8 ± 7.4   | 43          | 57.7 ± 7.1          | 1.4 (-1.1, 3.8)     | 0.27    |
|                             |                                   | <b>26</b>     | 40          | 58.8 ± 7.4   | 43          | 57.7 ± 7.1          | 1.4 (-1.1, 3.8)     | 0.27    |
| <b>Systolic dip (%)</b>     | <b>0</b>                          | 42            | 9.8 ± 6.9   | 45           | 10.7 ± 7.1  |                     |                     |         |
|                             | <b>6</b>                          | 40            | 9.9 ± 7.6   | 43           | 9.6 ± 6.1   | 0.7 (-1.9, 3.3)     | 0.60                |         |
|                             | <b>26</b>                         | 40            | 9.9 ± 7.6   | 43           | 9.6 ± 6.1   | 0.7 (-1.9, 3.3)     | 0.60                |         |
| <b>Diastolic dip (%)</b>    | <b>0</b>                          | 42            | 17.7 ± 8.1  | 45           | 17.7 ± 9.3  |                     |                     |         |
|                             | <b>6</b>                          | 40            | 14.7 ± 9.9  | 43           | 15.6 ± 9.1  | -0.9 (-4.6, 2.8)    | 0.63                |         |
|                             | <b>26</b>                         | 40            | 14.7 ± 9.9  | 43           | 15.6 ± 9.1  | -0.9 (-4.6, 2.8)    | 0.63                |         |
| <b>Lipid profile</b>        | <b>Total cholesterol (mmol/L)</b> | <b>0</b>      | 42          | 4.33 ± 0.97  | 45          | 4.41 ± 0.84         |                     |         |
|                             |                                   | <b>6</b>      | 39          | 4.44 ± 0.87  | 43          | 4.42 ± 0.86         | 0.03 (-0.34, 0.40)  | 0.87    |
|                             |                                   | <b>12</b>     | 37          | 4.08 ± 0.86  | 40          | 4.29 ± 0.82         | -0.16 (-0.54, 0.22) | 0.41    |
|                             |                                   | <b>26</b>     | 36          | 4.21 ± 0.84  | 40          | 4.23 ± 0.83         | 0.05 (-0.33, 0.43)  | 0.80    |
|                             | <b>LDL (mmol/L)</b>               | <b>0</b>      | 42          | 2.61 ± 0.84  | 45          | 2.73 ± 0.68         |                     |         |
|                             |                                   | <b>6</b>      | 39          | 2.73 ± 0.77  | 43          | 2.74 ± 0.72         | 0.01 (-0.31, 0.34)  | 0.94    |
|                             |                                   | <b>12</b>     | 37          | 2.48 ± 0.77  | 40          | 2.77 ± 0.67         | -0.23 (-0.56, 0.10) | 0.16    |
|                             |                                   | <b>26</b>     | 36          | 2.62 ± 0.79  | 40          | 2.74 ± 0.70         | -0.04 (-0.37, 0.29) | 0.81    |
|                             | <b>HDL (mmol/L)</b>               | <b>0</b>      | 42          | 1.20 ± 0.27  | 45          | 1.23 ± 0.32         |                     |         |
|                             |                                   | <b>6</b>      | 39          | 1.26 ± 0.30  | 43          | 1.22 ± 0.25         | 0.04 (-0.05, 0.14)  | 0.39    |
|                             |                                   | <b>12</b>     | 37          | 1.19 ± 0.25  | 40          | 1.19 ± 0.25         | -0.01 (-0.11, 0.09) | 0.88    |
|                             |                                   | <b>26</b>     | 36          | 1.24 ± 0.26  | 40          | 1.17 ± 0.24         | 0.06 (-0.03, 0.16)  | 0.20    |
| <b>TG (mmol/L)</b>          | <b>0</b>                          | 42            | 1.53 ± 0.80 | 45           | 1.23 ± 0.73 |                     |                     |         |
|                             | <b>6</b>                          | 39            | 1.39 ± 0.77 | 43           | 1.33 ± 0.77 | -0.10 (-0.39, 0.19) | 0.48                |         |
|                             | <b>12</b>                         | 37            | 1.33 ± 0.82 | 40           | 1.23 ± 0.65 | 0.00 (-0.29, 0.30)  | 0.98                |         |
|                             | <b>26</b>                         | 36            | 1.37 ± 0.90 | 40           | 1.31 ± 0.66 | -0.04 (-0.34, 0.25) | 0.78                |         |
| <b>Liver function</b>       | <b>ALT (U/L)</b>                  | <b>0</b>      | 42          | 26.6 ± 14.6  | 45          | 22.1 ± 11.6         |                     |         |
|                             |                                   | <b>6</b>      | 39          | 28.8 ± 20.0  | 43          | 26.4 ± 15.6         | 1.1 (-6.0, 8.3)     | 0.76    |
|                             |                                   | <b>12</b>     | 37          | 28.9 ± 20.6  | 40          | 25.3 ± 15.5         | 2.6 (-4.8, 9.9)     | 0.49    |
|                             |                                   | <b>26</b>     | 36          | 32.1 ± 20.3  | 40          | 25.9 ± 15.8         | 4.2 (-3.2, 11.7)    | 0.26    |
|                             | <b>AST (U/L)</b>                  | <b>0</b>      | 42          | 29.0 ± 9.1   | 45          | 26.3 ± 10.2         |                     |         |
|                             |                                   | <b>6</b>      | 39          | 28.3 ± 11.7  | 43          | 27.9 ± 7.0          | 0.4 (-3.7, 4.5)     | 0.86    |
|                             |                                   | <b>12</b>     | 37          | 28.0 ± 11.9  | 40          | 24.8 ± 7.7          | 2.9 (-1.3, 7.2)     | 0.17    |
|                             |                                   | <b>26</b>     | 36          | 28.1 ± 11.6  | 40          | 27.4 ± 9.5          | -0.2 (-4.5, 4.1)    | 0.92    |
|                             | <b>GGT (U/L)</b>                  | <b>0</b>      | 42          | 33.6 ± 21.7  | 45          | 28.0 ± 16.3         |                     |         |
|                             |                                   | <b>6</b>      | 39          | 34.7 ± 26.9  | 43          | 25.3 ± 12.0         | 6.6 (-0.1, 13.2)    | 0.052   |
|                             |                                   | <b>12</b>     | 37          | 32.8 ± 27.2  | 40          | 24.9 ± 10.7         | 5.1 (-1.7, 11.9)    | 0.14    |
|                             |                                   | <b>26</b>     | 36          | 32.9 ± 24.4  | 40          | 24.9 ± 12.8         | 5.0 (-1.9, 11.9)    | 0.15    |
| <b>Inflammatory markers</b> | <b>Uric acid (umol/L)</b>         | <b>0</b>      | 42          | 418 ± 88     | 45          | 394 ± 73            |                     |         |

|                     | Visit (weeks) | FMT |             | Placebo |             | aMD (95% CI)        | p-value |
|---------------------|---------------|-----|-------------|---------|-------------|---------------------|---------|
|                     |               | N   | mean ± SD   | N       | mean ± SD   |                     |         |
|                     | 6             | 39  | 396 ± 90    | 43      | 404 ± 84    | -8 (-40, 25)        | 0.64    |
|                     | 12            | 37  | 391 ± 107   | 40      | 404 ± 76    | -13 (-46, 20)       | 0.44    |
|                     | 26            | 36  | 398 ± 85    | 40      | 410 ± 85    | -10 (-44, 23)       | 0.54    |
| <b>hsCRP (mg/L)</b> | 0             | 42  | 3.32 ± 3.50 | 45      | 3.30 ± 3.69 |                     |         |
|                     | 6             | 39  | 3.54 ± 3.54 | 43      | 3.64 ± 4.37 | -0.10 (-1.75, 1.56) | 0.91    |
|                     | 12            | 37  | 3.02 ± 2.93 | 40      | 3.45 ± 3.47 | -0.68 (-2.37, 1.02) | 0.43    |
|                     | 26            | 36  | 3.52 ± 3.48 | 40      | 4.12 ± 4.57 | -0.81 (-2.53, 0.92) | 0.36    |

Adjusted mean differences (aMD) and 95% confidence intervals (CI).

24hAMBP, 24-hour ambulatory blood pressure monitoring; ALT, alanine transaminase; AST, aspartate transaminase; DBP, diastolic blood pressure; GGT, gamma-glutamyl transferase; FMT, fecal microbiome transfer; HDL, high-density lipoprotein cholesterol; hsCRP, high-sensitivity C-reactive protein; LDL, low-density lipoprotein cholesterol; SBP, systolic blood pressure; SD, standard deviation; TG, triglycerides.

P-values <0.05 were deemed statistically significant.

**eTable 3: BMI SDS and Glucose Metabolism of Participants With Metabolic Syndrome at Baseline**

|                           |                                 | Visit (weeks) | FMT               |                    | Placebo           |                    | aMD (95% CI)         | p-value |
|---------------------------|---------------------------------|---------------|-------------------|--------------------|-------------------|--------------------|----------------------|---------|
|                           |                                 |               | N                 | mean (95% CI)      | N                 | mean (95% CI)      |                      |         |
| <b>Anthropometry</b>      | <b>BMI SDS</b>                  | <b>0</b>      | 18                | 4.01 (3.63, 4.38)  | 13                | 3.09 (2.66, 3.53)  | 0.91 (0.34, 1.49)    | <0.0001 |
|                           |                                 | <b>6</b>      | 17                | 3.72 (3.63, 3.80)  | 13                | 3.70 (3.60, 3.81)  | 0.01 (-0.13, 0.15)   | 0.88    |
|                           |                                 | <b>12</b>     | 17                | 3.70 (3.61, 3.79)  | 12                | 3.71 (3.60, 3.82)  | -0.01 (-0.15, 0.14)  | 0.93    |
|                           |                                 | <b>26</b>     | 17                | 3.74 (3.65, 3.82)  | 12                | 3.71 (3.60, 3.82)  | -0.01 (-0.15, 0.14)  | 0.93    |
| <b>Glucose metabolism</b> | <b>Fasting insulin (µU/ml)</b>  | <b>0</b>      | 18                | 35.5 (27.2, 46.2)  | 13                | 28.8 (21.2, 39.2)  | 1.23 (0.82, 1.84)    | 0.30    |
|                           |                                 | <b>6</b>      | 16                | 27.7 (22.3, 34.4)  | 13                | 39.0 (30.5, 49.9)  | 0.71 (0.51, 0.99)    | 0.042   |
|                           |                                 | <b>12</b>     | 13                | 36.1 (28.6, 45.5)  | 12                | 33.4 (26.0, 43.0)  | 1.08 (0.77, 1.52)    | 0.66    |
|                           |                                 | <b>26</b>     | 15                | 31.2 (25.0, 39.0)  | 12                | 35.4 (27.5, 45.6)  | 0.88 (0.63, 1.23)    | 0.45    |
|                           | <b>Fasting glucose (mmol/L)</b> | <b>0</b>      | 18                | 5.42 (5.21, 5.64)  | 13                | 5.58 (5.33, 5.83)  | -0.16 (-0.49, 0.17)  | 0.33    |
|                           |                                 | <b>6</b>      | 16                | 5.15 (4.92, 5.39)  | 13                | 5.53 (5.28, 5.79)  | -0.38 (-0.73, -0.03) | 0.033   |
|                           |                                 | <b>12</b>     | 13                | 5.22 (4.96, 5.47)  | 12                | 5.51 (5.24, 5.78)  | -0.29 (-0.66, 0.08)  | 0.12    |
|                           |                                 | <b>26</b>     | 15                | 5.44 (5.20, 5.68)  | 12                | 5.55 (5.29, 5.82)  | -0.12 (-0.48, 0.24)  | 0.52    |
|                           | <b>HOMA-IR</b>                  | <b>0</b>      | 18                | 8.53 (6.49, 11.22) | 13                | 7.12 (5.18, 9.79)  | 1.20 (0.79, 1.82)    | 0.38    |
|                           |                                 | <b>6</b>      | 16                | 6.29 (5.00, 7.92)  | 13                | 9.60 (7.41, 12.43) | 0.66 (0.46, 0.93)    | 0.018   |
|                           |                                 | <b>12</b>     | 13                | 8.27 (6.47, 10.58) | 12                | 8.13 (6.23, 10.61) | 1.02 (0.71, 1.46)    | 0.93    |
|                           |                                 | <b>26</b>     | 15                | 7.49 (5.92, 9.48)  | 12                | 8.69 (6.66, 11.34) | 0.86 (0.60, 1.23)    | 0.41    |
| <b>Matsuda index</b>      | <b>0</b>                        | 18            | 1.14 (0.87, 1.51) | 13                 | 1.25 (0.90, 1.72) | 0.92 (0.60, 1.40)  | 0.68                 |         |
|                           | <b>6</b>                        | 16            | 1.45 (1.21, 1.73) | 13                 | 1.11 (0.91, 1.35) | 1.30 (1.00, 1.71)  | 0.053                |         |
|                           | <b>12</b>                       | 13            | 1.13 (0.93, 1.38) | 12                 | 1.31 (1.07, 1.62) | 0.86 (0.65, 1.15)  | 0.30                 |         |
|                           | <b>26</b>                       | 15            | 1.14 (0.95, 1.38) | 12                 | 1.16 (0.94, 1.43) | 0.98 (0.74, 1.30)  | 0.90                 |         |

Group data for BMI SDS and fasting glucose are adjusted means and 95% confidence intervals (CI), adjusted for sex; for the same parameters, the adjusted mean differences (aMD) are means and 95% CI adjusted for sex and the baseline value of the outcome (except for the aMD for baseline).

Group data for fasting insulin, HOMA-IR, and Matsuda index are the geometric means and 95% CI (back-transformed from logged data), adjusted for sex; the aMD for the same parameters are also geometric means and 95% CI, adjusted for sex and the baseline value of the outcome.

BMI SDS, body mass index standard deviation score; FMT, fecal microbiome transfer; HOMA-IR, homeostatic model assessment of insulin resistance.

P-values <0.05 were deemed statistically significant.

**eTable 4:** Changes in Prevalence of Metabolic Syndrome Among Participants with Metabolic Syndrome at Baseline

|                             | Visit (weeks) | FMT<br>n (%) | Placebo<br>n (%) | aOR (95% CI)       | p-value |
|-----------------------------|---------------|--------------|------------------|--------------------|---------|
| <b>Metabolic syndrome *</b> | <b>0</b>      | 18 (100%)    | 13 (100%)        |                    |         |
|                             | <b>6</b>      | 13 (81%)     | 9 (69%)          | 2.00 (0.32, 12.69) | 0.45    |
|                             | <b>12</b>     | 5 (38%)      | 7 (58%)          | 0.42 (0.07, 2.50)  | 0.33    |
|                             | <b>26</b>     | 4 (27%)      | 10 (83%)         | 0.06 (0.01, 0.45)  | 0.0074  |

Adjusted odds ratios (aOR) and 95% confidence intervals (CI).

FMT, fecal microbiome transfer

\*Metabolic syndrome outcome is defined in eTable 6.

P-values <0.05 were deemed statistically significant.

**eTable 5.** Variance of Species Taxonomic Profiles (Bray-Curtis Dissimilarity) Explained by Each Covariate in Cross-Sectional PERMANOVA

| Covariates      | Baseline (n = 84) |         |         | Week 6 (n = 82) |         |              | Week 12 (n = 77) |         |         | Week 26 (n = 73) |         |              |
|-----------------|-------------------|---------|---------|-----------------|---------|--------------|------------------|---------|---------|------------------|---------|--------------|
|                 | R <sup>2</sup>    | p-value | q-value | R <sup>2</sup>  | p-value | q-value      | R <sup>2</sup>   | p-value | q-value | R <sup>2</sup>   | p-value | q-value      |
| Sequence batch  | 4.71%             | 0.057   | 0.15    | 3.21%           | 0.086   | 0.18         | n/a              | n/a     | n/a     | n/a              | n/a     | n/a          |
| Sex             | 1.29%             | 0.31    | 0.40    | 3.70%           | 0.001   | <b>0.013</b> | 1.32%            | 0.37    | 0.46    | 1.71%            | 0.18    | 0.28         |
| Age             | 1.53%             | 0.16    | 0.28    | 0.55%           | 0.96    | 0.96         | 1.69%            | 0.17    | 0.28    | 3.30%            | 0.008   | <b>0.055</b> |
| Ethnicity       | 6.45%             | 0.032   | 0.14    | 6.23%           | 0.050   | 0.15         | 6.86%            | 0.060   | 0.15    | 5.98%            | 0.22    | 0.31         |
| Antibiotics     | NA                | NA      | NA      | 1.49%           | 0.18    | 0.28         | 1.03%            | 0.64    | 0.71    | 1.22%            | 0.49    | 0.57         |
| Treatment group | 0.59%             | 0.95    | 0.96    | 2.73%           | 0.006   | 0.055        | 2.94%            | 0.011   | 0.060   | 2.23%            | 0.063   | 0.15         |

Table contain R<sup>2</sup> (the proportion of variance explained), nominal p-value based on 10,000 permutation tests, and FDR-adjusted p-values (q-values) after multiple comparisons.

q-values <0.1 are statistically significant.

n/a, not applicable.

**eTable 6.** Variance of Species Taxonomic Profiles (Bray-Curtis Dissimilarity) Explained by Each Covariate in PERMANOVA for Donors and Recipients at Baseline

| Covariates        | R <sup>2</sup> | p-value | q-value      |
|-------------------|----------------|---------|--------------|
| Sex               | 0.91%          | 0.566   | 0.566        |
| Ethnicity         | 5.55%          | 0.045   | <b>0.068</b> |
| Participant type* | 1.80%          | 0.042   | <b>0.068</b> |

Table contain R<sup>2</sup> (the proportion of variance explained), nominal p-value based on 10,000 permutation tests, and FDR-adjusted p-values (q-values) after multiple comparisons.

Significant findings are highlighted in bold (q value <0.1).

\*Participant type compared the microbiomes of 9 donors with 87 participants at baseline.



**eTable 7.** Definitions of Abnormal Outcomes

| OUTCOMES                       | THRESHOLDS FOR ABNORMAL OUTCOMES                                                                                                                                                                                                                                                                                                                                                                                                                                                       | REFERENCE                                          |
|--------------------------------|----------------------------------------------------------------------------------------------------------------------------------------------------------------------------------------------------------------------------------------------------------------------------------------------------------------------------------------------------------------------------------------------------------------------------------------------------------------------------------------|----------------------------------------------------|
| <b>Abnormal glycaemia</b>      | Fasting glucose $\geq 5.6$ mmol/L or 2-hour glucose $\geq 7.8$ mmol/L or HbA1c $\geq 39$ mmol/mol                                                                                                                                                                                                                                                                                                                                                                                      | American Diabetes Association 2018 <sup>1</sup>    |
| <b>Elevated clinic BP</b>      | <16 years: SBP and/or DBP $\geq 90^{\text{th}}$ for age and sex<br><br>$\geq 16$ years: SBP $\geq 130$ and/or DBP $\geq 85$ mmHg                                                                                                                                                                                                                                                                                                                                                       | Lurbe et al. 2016 <sup>2</sup>                     |
| <b>Low HDL</b>                 | <16 years: <1.03 mmol/L<br><br>$\geq 16$ years: males <1.03 mmol/L; females <1.29 mmol/L                                                                                                                                                                                                                                                                                                                                                                                               | Zimmet et al. 2007 <sup>3</sup>                    |
| <b>High LDL</b>                | >2.6 mmol/L                                                                                                                                                                                                                                                                                                                                                                                                                                                                            | NCEP 2001 <sup>4</sup>                             |
| <b>High triglycerides</b>      | $\geq 1.7$ mmol/L                                                                                                                                                                                                                                                                                                                                                                                                                                                                      | Zimmet et al. 2007 <sup>3</sup>                    |
| <b>High total cholesterol</b>  | >5.2 mmol/L                                                                                                                                                                                                                                                                                                                                                                                                                                                                            | European Atherosclerosis Society 1987 <sup>5</sup> |
| <b>Dyslipidaemia</b>           | Low HDL or high LDL or high triglycerides or high total cholesterol                                                                                                                                                                                                                                                                                                                                                                                                                    |                                                    |
| <b>Elevated ALT</b>            | Males >41 U/L; females >33 U/L                                                                                                                                                                                                                                                                                                                                                                                                                                                         | Klein et al. 1994 <sup>6</sup>                     |
| <b>Elevated AST</b>            | Males >40 U/L, females >32 U/L                                                                                                                                                                                                                                                                                                                                                                                                                                                         | Thefeld et al. 1974 <sup>7</sup>                   |
| <b>Elevated GGT</b>            | Males $\geq 60$ U/L, females $\geq 40$ U/L                                                                                                                                                                                                                                                                                                                                                                                                                                             | Thomas et al. 2005 <sup>8</sup>                    |
| <b>Abnormal liver function</b> | Elevated ALT or elevated AST or elevated GGT                                                                                                                                                                                                                                                                                                                                                                                                                                           |                                                    |
| <b>Metabolic syndrome</b>      | $\geq 10$ but <16 years:<br>Waist circumference $\geq 90^{\text{th}}$ percentile (or adult cut-off if the latter is lower); AND any 2 of the following 4 criteria:<br>1. triglycerides $\geq 1.7$ mmol/L<br>2. HDL <1.03 mmol/L<br>3. SBP $\geq 130$ and/or DBP $\geq 85$ mmHg<br>4. Fasting glucose $\geq 5.6$ mmol/L and/or previously diagnosed type 2 diabetes                                                                                                                     | Zimmet et al. 2007 <sup>3</sup>                    |
|                                | $\geq 16$ years:<br>Waist circumference $\geq 94$ cm for males and $\geq 80$ cm for females; AND any 2 of the following 4 criteria:<br>1. triglycerides $\geq 1.7$ mmol/L<br>2. HDL <1.03 mmol/L in males and <1.29 mmol/L in females; or specific treatment for these lipid abnormalities<br>3. SBP $\geq 130$ mmHg and/or DBP $\geq 85$ mmHg, or treatment for previously diagnosed hypertension<br>4. Fasting glucose $\geq 5.6$ mmol/L and/or previously diagnosed type 2 diabetes |                                                    |

24hABPM, 24-hour ambulatory blood pressure monitoring; ALT, alanine transaminase; AST, aspartate transaminase; BP, blood pressure; DBP, diastolic blood pressure; GGT, gamma-glutamyl transferase; hsCRP, high-sensitivity C-reactive protein; HbA1c, haemoglobin A1c; HDL, high-density lipoprotein cholesterol; LDL, low-density lipoprotein cholesterol; SBP, systolic blood pressure.

## eReferences

1. American Diabetes Association. Classification and Diagnosis of Diabetes: Standards of Medical Care in Diabetes 2018. *Diabetes Care*. 2018;41(Supplement 1):S13-S27.
2. Lurbe E, Agabiti-Rosei E, Cruickshank JK, et al. 2016 European Society of Hypertension guidelines for the management of high blood pressure in children and adolescents. *J Hypertens*. 2016;34(10):1887-1920.
3. Zimmet P, Alberti KGM, Kaufman F, et al. The metabolic syndrome in children and adolescents—an IDF consensus report. *Pediatr Diabetes*. 2007;8(5):299-306.
4. NCEP Expert Panel. Executive Summary of The Third Report of The National Cholesterol Education Program (NCEP) Expert Panel on Detection, Evaluation, And Treatment of High Blood Cholesterol In Adults (Adult Treatment Panel III). *JAMA*. 2001;285(19):2486-2497.
5. European Atherosclerosis Society. Strategies for the prevention of coronary heart disease: a policy statement of the European Atherosclerosis Society. *Eur Heart J*. 1987;8(1):77-88.
6. Klein G, Lehmann P, Michel E, Regenauer H. [Comparison of the IFCC methods for ALT, AST and GGT at 37°C with the established standard methods at 25°C and 37°C]. *Lab Med*. 1994;18:403-404.
7. Thefeld W, Hoffmeister H, Busch E-W, Koller P, Vollmar J. [Reference values for the determinations of the transaminases GOT and GPT as well as serum alkaline phosphatase using optimized standard methods]. *Dtsch Med Wochenschr*. 1974;99(8):343-351.
8. Thomas L, Müller M, Schumann G, et al. Consensus of DGKL and VDGH for interim reference intervals on enzymes in serum *J Lab Med*. 2005;29(5):301-308.
